# Supplementary material for: Hybrid purity identification using EST-SSR markers and heterosis analysis of quantitative traits of Russian wildrye
Source: PeerJ journal article supplement (doi:10.7717/peerj.14442), 2022-11-30
Supplement: raw-code_&_result.zip [file raw-code_%26_result.zip]

install.packages("see")

install.packages("correlation")

library(see)

library(correlation)

getwd()

df<-read.csv("R-correlation analysis-raw data.csv")

df

correlation(df[,2:14])->df.cor

df.cor

write.table(df.cor,file="R-correlation analysis results.csv",quote = F,row.names = F)

plot(summary(df.cor),show_values=T,show_p=T,size_point=1.4)
