# Supplementary material for: Hybrid purity identification using EST-SSR markers and heterosis analysis of quantitative traits of Russian wildrye
Source: PeerJ. 2022 Nov 30;10:e14442. doi: 10.7717/peerj.14442 (PMC9744169; doi:10.7717/peerj.14442)
Supplement: Supplemental Information 4 — P1, Female parent; P2, Male parent; 1—123, Hybrids [file peerj-10-14442-s004.xlsx]

## Sheet: Sheet1
Note:P1,Female parent;P2,Male parent;1—123,Hybrids
Genetic similarity coefficient	P1	P2	1	2	3	4	5	6	7	8	9	10	11	12	13	14	15	16	17	18	19	20	21	22	23	24	25	26	27	28	29	30	31	32	33	34	35	36	37	38	39	40	41	42	44	45	46	47	48
P1
P2	0.605263
1	0.605263	0.631579
2	0.684211	0.657895	0.921053
3	0.789474	0.657895	0.763158	0.842105
4	0.736842	0.605263	0.763158	0.789474	0.789474
5	0.684211	0.763158	0.763158	0.789474	0.736842	0.789474
6	0.631579	0.605263	0.710526	0.736842	0.736842	0.842105	0.789474
7	0.657895	0.736842	0.736842	0.710526	0.657895	0.710526	0.815789	0.710526
8	0.578947	0.710526	0.868421	0.842105	0.736842	0.736842	0.789474	0.736842	0.710526
9	0.763158	0.789474	0.736842	0.815789	0.815789	0.763158	0.815789	0.657895	0.736842	0.710526
10	0.657895	0.842105	0.684211	0.763158	0.763158	0.763158	0.763158	0.710526	0.684211	0.763158	0.842105
11	0.815789	0.684211	0.736842	0.815789	0.868421	0.763158	0.815789	0.815789	0.789474	0.763158	0.789474	0.736842
12	0.657895	0.736842	0.473684	0.552632	0.657895	0.605263	0.710526	0.710526	0.736842	0.552632	0.736842	0.736842	0.736842
13	0.684211	0.763158	0.710526	0.736842	0.789474	0.789474	0.842105	0.842105	0.710526	0.684211	0.815789	0.815789	0.815789	0.763158
14	0.763158	0.684211	0.736842	0.815789	0.815789	0.763158	0.815789	0.815789	0.736842	0.763158	0.789474	0.736842	0.947368	0.684211	0.815789
15	0.684211	0.605263	0.710526	0.736842	0.684211	0.789474	0.736842	0.789474	0.763158	0.684211	0.763158	0.710526	0.763158	0.710526	0.789474	0.763158
16	0.657895	0.684211	0.736842	0.763158	0.763158	0.815789	0.815789	0.815789	0.736842	0.815789	0.736842	0.789474	0.789474	0.684211	0.763158	0.736842	0.710526
17	0.657895	0.736842	0.789474	0.815789	0.763158	0.763158	0.868421	0.763158	0.736842	0.815789	0.842105	0.736842	0.789474	0.684211	0.815789	0.789474	0.657895	0.842105
18	0.605263	0.736842	0.789474	0.815789	0.815789	0.710526	0.763158	0.763158	0.631579	0.815789	0.789474	0.789474	0.789474	0.684211	0.815789	0.789474	0.657895	0.842105	0.842105
19	0.710526	0.631579	0.789474	0.815789	0.763158	0.763158	0.815789	0.710526	0.736842	0.763158	0.736842	0.684211	0.789474	0.631579	0.763158	0.736842	0.657895	0.842105	0.894737	0.789474
20	0.684211	0.657895	0.763158	0.789474	0.789474	0.789474	0.894737	0.842105	0.710526	0.789474	0.763158	0.710526	0.868421	0.710526	0.842105	0.868421	0.736842	0.815789	0.868421	0.815789	0.815789
21	0.736842	0.710526	0.815789	0.842105	0.842105	0.789474	0.842105	0.789474	0.815789	0.789474	0.815789	0.763158	0.921053	0.657895	0.842105	0.868421	0.736842	0.815789	0.815789	0.815789	0.815789	0.842105
22	0.631579	0.657895	0.815789	0.789474	0.736842	0.789474	0.684211	0.684211	0.657895	0.736842	0.710526	0.657895	0.710526	0.552632	0.789474	0.710526	0.789474	0.710526	0.763158	0.763158	0.815789	0.736842	0.736842
23	0.894737	0.657895	0.710526	0.789474	0.842105	0.789474	0.789474	0.736842	0.763158	0.684211	0.868421	0.763158	0.921053	0.763158	0.789474	0.868421	0.789474	0.763158	0.763158	0.710526	0.763158	0.789474	0.842105	0.684211
24	0.842105	0.657895	0.710526	0.789474	0.842105	0.736842	0.736842	0.736842	0.710526	0.684211	0.815789	0.763158	0.921053	0.763158	0.736842	0.868421	0.736842	0.710526	0.710526	0.710526	0.710526	0.789474	0.842105	0.631579	0.947368
25	0.684211	0.815789	0.657895	0.736842	0.736842	0.736842	0.842105	0.736842	0.815789	0.736842	0.815789	0.868421	0.815789	0.815789	0.789474	0.815789	0.789474	0.763158	0.763158	0.763158	0.710526	0.789474	0.789474	0.684211	0.789474	0.789474
26	0.684211	0.763158	0.657895	0.736842	0.736842	0.789474	0.842105	0.736842	0.710526	0.736842	0.868421	0.868421	0.763158	0.763158	0.789474	0.763158	0.842105	0.815789	0.763158	0.763158	0.710526	0.789474	0.789474	0.684211	0.789474	0.789474	0.894737
27	0.684211	0.657895	0.605263	0.631579	0.684211	0.736842	0.789474	0.789474	0.763158	0.578947	0.710526	0.710526	0.763158	0.763158	0.842105	0.710526	0.736842	0.763158	0.710526	0.710526	0.763158	0.736842	0.789474	0.684211	0.736842	0.684211	0.789474	0.736842
28	0.684211	0.763158	0.710526	0.736842	0.736842	0.789474	0.789474	0.736842	0.710526	0.684211	0.815789	0.815789	0.763158	0.657895	0.894737	0.763158	0.736842	0.763158	0.763158	0.815789	0.763158	0.736842	0.842105	0.789474	0.736842	0.684211	0.789474	0.789474	0.894737
29	0.710526	0.684211	0.684211	0.763158	0.710526	0.710526	0.710526	0.605263	0.631579	0.605263	0.842105	0.789474	0.684211	0.631579	0.763158	0.684211	0.710526	0.684211	0.684211	0.736842	0.736842	0.657895	0.710526	0.710526	0.763158	0.710526	0.710526	0.763158	0.763158	0.868421
30	0.684211	0.710526	0.710526	0.684211	0.578947	0.684211	0.736842	0.684211	0.815789	0.684211	0.710526	0.710526	0.710526	0.657895	0.736842	0.710526	0.736842	0.657895	0.657895	0.657895	0.710526	0.631579	0.736842	0.684211	0.736842	0.684211	0.736842	0.684211	0.789474	0.842105	0.815789
31	0.736842	0.710526	0.815789	0.842105	0.789474	0.894737	0.842105	0.789474	0.763158	0.789474	0.868421	0.868421	0.815789	0.605263	0.842105	0.815789	0.789474	0.815789	0.815789	0.763158	0.763158	0.789474	0.894737	0.736842	0.842105	0.789474	0.789474	0.842105	0.736842	0.842105	0.763158	0.736842
32	0.763158	0.736842	0.631579	0.710526	0.815789	0.815789	0.763158	0.710526	0.684211	0.710526	0.789474	0.842105	0.842105	0.736842	0.815789	0.789474	0.763158	0.789474	0.736842	0.736842	0.789474	0.763158	0.815789	0.763158	0.815789	0.815789	0.815789	0.868421	0.763158	0.815789	0.736842	0.657895	0.815789
33	0.763158	0.789474	0.736842	0.763158	0.763158	0.763158	0.815789	0.657895	0.789474	0.763158	0.842105	0.842105	0.789474	0.684211	0.763158	0.789474	0.710526	0.684211	0.736842	0.736842	0.736842	0.710526	0.763158	0.710526	0.815789	0.763158	0.868421	0.763158	0.763158	0.815789	0.789474	0.815789	0.815789	0.789474
34	0.710526	0.631579	0.736842	0.815789	0.710526	0.815789	0.815789	0.710526	0.684211	0.710526	0.789474	0.789474	0.736842	0.578947	0.763158	0.736842	0.710526	0.736842	0.789474	0.684211	0.842105	0.763158	0.763158	0.710526	0.763158	0.710526	0.710526	0.763158	0.710526	0.763158	0.789474	0.710526	0.868421	0.789474	0.789474
35	0.842105	0.657895	0.657895	0.736842	0.789474	0.789474	0.789474	0.684211	0.657895	0.631579	0.815789	0.763158	0.815789	0.763158	0.789474	0.763158	0.684211	0.710526	0.763158	0.657895	0.815789	0.789474	0.789474	0.684211	0.894737	0.894737	0.736842	0.789474	0.736842	0.736842	0.763158	0.684211	0.789474	0.868421	0.763158	0.815789
36	0.763158	0.736842	0.684211	0.710526	0.763158	0.763158	0.710526	0.657895	0.684211	0.605263	0.842105	0.842105	0.736842	0.736842	0.815789	0.684211	0.710526	0.736842	0.684211	0.736842	0.736842	0.657895	0.815789	0.710526	0.815789	0.815789	0.763158	0.815789	0.815789	0.868421	0.842105	0.763158	0.815789	0.842105	0.789474	0.736842	0.868421
37	0.763158	0.736842	0.736842	0.763158	0.815789	0.763158	0.815789	0.763158	0.842105	0.710526	0.842105	0.789474	0.894737	0.736842	0.868421	0.842105	0.815789	0.789474	0.789474	0.789474	0.789474	0.763158	0.921053	0.763158	0.868421	0.815789	0.868421	0.815789	0.868421	0.868421	0.736842	0.763158	0.868421	0.842105	0.842105	0.736842	0.763158	0.842105
38	0.684211	0.657895	0.657895	0.684211	0.736842	0.789474	0.789474	0.789474	0.815789	0.684211	0.763158	0.763158	0.815789	0.763158	0.789474	0.763158	0.842105	0.815789	0.710526	0.763158	0.710526	0.736842	0.842105	0.684211	0.789474	0.736842	0.842105	0.842105	0.842105	0.789474	0.657895	0.684211	0.842105	0.815789	0.763158	0.710526	0.684211	0.763158	0.921053
39	0.736842	0.763158	0.763158	0.789474	0.842105	0.789474	0.842105	0.736842	0.815789	0.736842	0.868421	0.815789	0.868421	0.710526	0.894737	0.815789	0.789474	0.815789	0.815789	0.815789	0.815789	0.789474	0.947368	0.789474	0.842105	0.789474	0.842105	0.842105	0.842105	0.894737	0.763158	0.736842	0.894737	0.868421	0.815789	0.763158	0.789474	0.868421	0.973684	0.894737
40	0.657895	0.631579	0.631579	0.710526	0.710526	0.815789	0.815789	0.815789	0.684211	0.710526	0.736842	0.736842	0.736842	0.736842	0.763158	0.736842	0.763158	0.789474	0.789474	0.789474	0.789474	0.763158	0.710526	0.710526	0.710526	0.657895	0.815789	0.815789	0.815789	0.763158	0.684211	0.657895	0.763158	0.789474	0.789474	0.789474	0.710526	0.684211	0.789474	0.868421	0.763158
41	0.578947	0.710526	0.657895	0.684211	0.684211	0.789474	0.736842	0.789474	0.763158	0.684211	0.710526	0.763158	0.710526	0.763158	0.736842	0.657895	0.684211	0.868421	0.763158	0.763158	0.710526	0.684211	0.789474	0.631579	0.684211	0.684211	0.736842	0.789474	0.736842	0.736842	0.605263	0.631579	0.789474	0.763158	0.605263	0.657895	0.684211	0.763158	0.763158	0.842105	0.789474	0.763158
42	0.684211	0.763158	0.710526	0.736842	0.684211	0.736842	0.947368	0.736842	0.763158	0.736842	0.815789	0.763158	0.763158	0.763158	0.789474	0.763158	0.736842	0.763158	0.815789	0.710526	0.763158	0.842105	0.789474	0.631579	0.789474	0.789474	0.842105	0.894737	0.736842	0.736842	0.710526	0.736842	0.789474	0.763158	0.763158	0.763158	0.842105	0.763158	0.763158	0.736842	0.789474	0.763158	0.736842
44	0.710526	0.736842	0.842105	0.868421	0.815789	0.868421	0.815789	0.763158	0.789474	0.815789	0.842105	0.842105	0.789474	0.631579	0.815789	0.789474	0.710526	0.789474	0.842105	0.789474	0.789474	0.763158	0.868421	0.763158	0.815789	0.763158	0.815789	0.763158	0.710526	0.815789	0.736842	0.763158	0.921053	0.736842	0.842105	0.789474	0.763158	0.789474	0.842105	0.763158	0.868421	0.736842	0.763158	0.763158
45	0.657895	0.578947	0.684211	0.763158	0.710526	0.815789	0.763158	0.710526	0.736842	0.657895	0.736842	0.684211	0.684211	0.631579	0.657895	0.631579	0.657895	0.789474	0.789474	0.631579	0.842105	0.710526	0.710526	0.657895	0.710526	0.657895	0.657895	0.710526	0.710526	0.657895	0.684211	0.605263	0.763158	0.736842	0.684211	0.842105	0.763158	0.684211	0.684211	0.710526	0.710526	0.789474	0.763158	0.710526	0.736842
46	0.736842	0.657895	0.710526	0.789474	0.736842	0.789474	0.842105	0.736842	0.763158	0.684211	0.815789	0.763158	0.815789	0.710526	0.736842	0.815789	0.736842	0.763158	0.763158	0.763158	0.710526	0.789474	0.789474	0.631579	0.842105	0.789474	0.842105	0.789474	0.736842	0.736842	0.710526	0.684211	0.842105	0.710526	0.815789	0.763158	0.736842	0.710526	0.815789	0.842105	0.789474	0.815789	0.736842	0.789474	0.815789	0.763158
47	0.631579	0.605263	0.815789	0.842105	0.736842	0.842105	0.842105	0.789474	0.710526	0.789474	0.763158	0.763158	0.710526	0.605263	0.736842	0.710526	0.736842	0.868421	0.868421	0.763158	0.868421	0.842105	0.736842	0.736842	0.736842	0.684211	0.736842	0.789474	0.684211	0.684211	0.710526	0.631579	0.842105	0.710526	0.710526	0.868421	0.736842	0.657895	0.710526	0.736842	0.736842	0.815789	0.736842	0.789474	0.815789	0.868421	0.789474
48	0.605263	0.631579	0.684211	0.710526	0.657895	0.763158	0.763158	0.868421	0.736842	0.763158	0.631579	0.736842	0.736842	0.736842	0.763158	0.736842	0.763158	0.842105	0.789474	0.736842	0.789474	0.815789	0.657895	0.710526	0.710526	0.657895	0.763158	0.710526	0.710526	0.657895	0.631579	0.710526	0.710526	0.684211	0.684211	0.736842	0.657895	0.578947	0.684211	0.710526	0.657895	0.789474	0.710526	0.710526	0.736842	0.736842	0.710526	0.868421
49	0.657895	0.684211	0.684211	0.710526	0.763158	0.763158	0.710526	0.763158	0.736842	0.657895	0.736842	0.736842	0.736842	0.736842	0.815789	0.684211	0.605263	0.736842	0.789474	0.684211	0.736842	0.710526	0.763158	0.657895	0.763158	0.710526	0.657895	0.605263	0.710526	0.710526	0.631579	0.657895	0.763158	0.684211	0.684211	0.684211	0.763158	0.736842	0.736842	0.657895	0.763158	0.631579	0.763158	0.657895	0.842105	0.789474	0.710526	0.710526	0.736842
50	0.684211	0.710526	0.710526	0.736842	0.736842	0.789474	0.842105	0.736842	0.868421	0.736842	0.763158	0.763158	0.815789	0.763158	0.789474	0.763158	0.736842	0.815789	0.763158	0.763158	0.763158	0.789474	0.894737	0.684211	0.789474	0.736842	0.842105	0.789474	0.789474	0.789474	0.657895	0.736842	0.842105	0.763158	0.763158	0.710526	0.736842	0.763158	0.868421	0.894737	0.894737	0.763158	0.842105	0.789474	0.868421	0.710526	0.842105	0.736842	0.710526
51	0.631579	0.657895	0.710526	0.736842	0.736842	0.789474	0.789474	0.789474	0.657895	0.789474	0.763158	0.710526	0.763158	0.657895	0.789474	0.763158	0.684211	0.815789	0.921053	0.763158	0.815789	0.842105	0.736842	0.736842	0.736842	0.684211	0.684211	0.736842	0.631579	0.684211	0.605263	0.578947	0.789474	0.763158	0.657895	0.763158	0.736842	0.605263	0.710526	0.684211	0.736842	0.763158	0.736842	0.736842	0.763158	0.815789	0.736842	0.842105	0.815789
52	0.789474	0.710526	0.605263	0.684211	0.789474	0.736842	0.789474	0.736842	0.710526	0.631579	0.763158	0.763158	0.815789	0.815789	0.789474	0.763158	0.736842	0.815789	0.710526	0.710526	0.710526	0.789474	0.789474	0.631579	0.842105	0.842105	0.789474	0.842105	0.736842	0.736842	0.710526	0.684211	0.736842	0.815789	0.657895	0.657895	0.842105	0.815789	0.763158	0.736842	0.789474	0.657895	0.789474	0.842105	0.710526	0.657895	0.736842	0.684211	0.710526
53	0.710526	0.631579	0.736842	0.815789	0.710526	0.710526	0.763158	0.657895	0.684211	0.657895	0.842105	0.684211	0.736842	0.684211	0.763158	0.736842	0.763158	0.631579	0.789474	0.631579	0.736842	0.763158	0.710526	0.710526	0.815789	0.763158	0.657895	0.710526	0.605263	0.657895	0.789474	0.657895	0.763158	0.684211	0.684211	0.789474	0.815789	0.684211	0.684211	0.605263	0.710526	0.631579	0.605263	0.763158	0.736842	0.736842	0.710526	0.763158	0.684211
54	0.736842	0.657895	0.763158	0.789474	0.736842	0.736842	0.842105	0.684211	0.710526	0.789474	0.815789	0.763158	0.763158	0.657895	0.736842	0.710526	0.736842	0.763158	0.763158	0.657895	0.763158	0.736842	0.789474	0.631579	0.842105	0.789474	0.684211	0.789474	0.684211	0.684211	0.710526	0.684211	0.842105	0.763158	0.763158	0.815789	0.842105	0.763158	0.763158	0.736842	0.789474	0.710526	0.684211	0.842105	0.763158	0.763158	0.736842	0.789474	0.657895
55	0.657895	0.578947	0.631579	0.710526	0.657895	0.657895	0.710526	0.710526	0.631579	0.657895	0.736842	0.684211	0.736842	0.684211	0.763158	0.789474	0.868421	0.631579	0.684211	0.631579	0.684211	0.710526	0.657895	0.710526	0.763158	0.710526	0.710526	0.763158	0.657895	0.657895	0.736842	0.657895	0.710526	0.736842	0.684211	0.736842	0.710526	0.631579	0.736842	0.710526	0.710526	0.736842	0.552632	0.710526	0.631579	0.631579	0.657895	0.710526	0.736842
56	0.605263	0.684211	0.631579	0.657895	0.710526	0.710526	0.710526	0.763158	0.631579	0.605263	0.736842	0.736842	0.684211	0.789474	0.763158	0.684211	0.657895	0.736842	0.789474	0.736842	0.684211	0.763158	0.605263	0.657895	0.710526	0.710526	0.763158	0.710526	0.710526	0.657895	0.631579	0.552632	0.657895	0.684211	0.684211	0.684211	0.710526	0.684211	0.684211	0.657895	0.657895	0.736842	0.710526	0.710526	0.684211	0.684211	0.710526	0.763158	0.789474
58	0.578947	0.657895	0.657895	0.684211	0.736842	0.684211	0.631579	0.631579	0.552632	0.578947	0.657895	0.710526	0.605263	0.605263	0.684211	0.605263	0.631579	0.710526	0.657895	0.710526	0.657895	0.684211	0.578947	0.736842	0.631579	0.631579	0.684211	0.684211	0.578947	0.631579	0.710526	0.526316	0.631579	0.657895	0.605263	0.657895	0.631579	0.657895	0.605263	0.578947	0.631579	0.605263	0.631579	0.631579	0.657895	0.605263	0.631579	0.736842	0.710526
59	0.789474	0.657895	0.657895	0.736842	0.736842	0.736842	0.684211	0.684211	0.710526	0.578947	0.710526	0.763158	0.815789	0.710526	0.736842	0.815789	0.684211	0.710526	0.657895	0.657895	0.763158	0.684211	0.736842	0.684211	0.842105	0.842105	0.736842	0.684211	0.736842	0.736842	0.763158	0.736842	0.736842	0.815789	0.763158	0.763158	0.842105	0.815789	0.763158	0.684211	0.736842	0.657895	0.684211	0.684211	0.710526	0.710526	0.736842	0.684211	0.710526
60	0.657895	0.631579	0.684211	0.710526	0.657895	0.710526	0.763158	0.710526	0.684211	0.605263	0.736842	0.736842	0.736842	0.684211	0.763158	0.736842	0.657895	0.631579	0.736842	0.684211	0.684211	0.710526	0.763158	0.605263	0.763158	0.763158	0.763158	0.710526	0.710526	0.710526	0.684211	0.657895	0.815789	0.684211	0.736842	0.736842	0.763158	0.736842	0.789474	0.763158	0.763158	0.736842	0.710526	0.763158	0.789474	0.631579	0.815789	0.710526	0.631579
61	0.684211	0.710526	0.710526	0.736842	0.736842	0.789474	0.736842	0.736842	0.710526	0.789474	0.763158	0.763158	0.763158	0.657895	0.736842	0.710526	0.631579	0.921053	0.868421	0.815789	0.868421	0.736842	0.789474	0.736842	0.736842	0.684211	0.684211	0.736842	0.736842	0.789474	0.710526	0.684211	0.789474	0.815789	0.710526	0.763158	0.736842	0.763158	0.763158	0.736842	0.789474	0.763158	0.842105	0.684211	0.763158	0.815789	0.684211	0.789474	0.763158
62	0.710526	0.736842	0.684211	0.763158	0.763158	0.815789	0.815789	0.763158	0.684211	0.763158	0.789474	0.842105	0.842105	0.684211	0.815789	0.842105	0.763158	0.789474	0.789474	0.736842	0.736842	0.815789	0.815789	0.710526	0.815789	0.815789	0.815789	0.868421	0.657895	0.763158	0.736842	0.657895	0.868421	0.894737	0.736842	0.789474	0.815789	0.736842	0.789474	0.763158	0.815789	0.736842	0.763158	0.815789	0.789474	0.684211	0.763158	0.763158	0.736842
63	0.710526	0.631579	0.631579	0.710526	0.710526	0.815789	0.763158	0.815789	0.736842	0.763158	0.684211	0.736842	0.842105	0.684211	0.710526	0.842105	0.763158	0.736842	0.684211	0.684211	0.684211	0.815789	0.763158	0.657895	0.763158	0.763158	0.815789	0.763158	0.710526	0.710526	0.684211	0.710526	0.763158	0.789474	0.789474	0.736842	0.710526	0.631579	0.736842	0.763158	0.710526	0.789474	0.657895	0.710526	0.736842	0.684211	0.763158	0.710526	0.789474
64	0.657895	0.578947	0.736842	0.763158	0.763158	0.657895	0.605263	0.657895	0.578947	0.657895	0.684211	0.631579	0.736842	0.631579	0.657895	0.684211	0.605263	0.736842	0.684211	0.789474	0.736842	0.710526	0.710526	0.710526	0.763158	0.763158	0.552632	0.605263	0.552632	0.605263	0.736842	0.605263	0.657895	0.631579	0.578947	0.631579	0.710526	0.684211	0.631579	0.605263	0.657895	0.578947	0.657895	0.605263	0.684211	0.631579	0.657895	0.710526	0.684211
65	0.657895	0.526316	0.736842	0.657895	0.605263	0.763158	0.710526	0.605263	0.736842	0.657895	0.684211	0.631579	0.631579	0.526316	0.605263	0.578947	0.710526	0.736842	0.631579	0.578947	0.736842	0.657895	0.710526	0.657895	0.710526	0.657895	0.605263	0.710526	0.710526	0.710526	0.789474	0.763158	0.763158	0.684211	0.684211	0.736842	0.710526	0.736842	0.684211	0.710526	0.710526	0.631579	0.657895	0.710526	0.684211	0.736842	0.657895	0.763158	0.631579
66	0.684211	0.710526	0.763158	0.842105	0.789474	0.736842	0.736842	0.736842	0.763158	0.789474	0.710526	0.763158	0.815789	0.710526	0.789474	0.763158	0.736842	0.815789	0.763158	0.763158	0.815789	0.736842	0.789474	0.789474	0.789474	0.736842	0.736842	0.684211	0.684211	0.736842	0.710526	0.736842	0.736842	0.763158	0.710526	0.710526	0.736842	0.710526	0.763158	0.684211	0.789474	0.657895	0.736842	0.684211	0.815789	0.710526	0.684211	0.736842	0.815789
67	0.710526	0.684211	0.736842	0.815789	0.763158	0.763158	0.815789	0.710526	0.684211	0.763158	0.789474	0.789474	0.789474	0.684211	0.815789	0.789474	0.710526	0.684211	0.789474	0.684211	0.736842	0.815789	0.763158	0.710526	0.815789	0.763158	0.763158	0.710526	0.710526	0.763158	0.736842	0.710526	0.815789	0.736842	0.789474	0.789474	0.815789	0.684211	0.736842	0.657895	0.763158	0.684211	0.605263	0.763158	0.842105	0.684211	0.763158	0.763158	0.736842
68	0.684211	0.710526	0.815789	0.842105	0.842105	0.842105	0.842105	0.842105	0.710526	0.894737	0.763158	0.763158	0.868421	0.605263	0.789474	0.868421	0.736842	0.815789	0.815789	0.815789	0.763158	0.842105	0.842105	0.736842	0.789474	0.789474	0.736842	0.789474	0.631579	0.736842	0.657895	0.684211	0.842105	0.815789	0.763158	0.763158	0.736842	0.657895	0.763158	0.736842	0.789474	0.763158	0.736842	0.789474	0.815789	0.710526	0.736842	0.789474	0.763158
69	0.631579	0.763158	0.657895	0.684211	0.736842	0.736842	0.842105	0.684211	0.763158	0.684211	0.763158	0.710526	0.710526	0.763158	0.736842	0.657895	0.631579	0.763158	0.815789	0.710526	0.815789	0.736842	0.736842	0.684211	0.684211	0.684211	0.789474	0.789474	0.789474	0.736842	0.657895	0.631579	0.684211	0.815789	0.763158	0.710526	0.789474	0.763158	0.763158	0.736842	0.789474	0.815789	0.789474	0.842105	0.710526	0.815789	0.684211	0.736842	0.657895
70	0.736842	0.763158	0.710526	0.736842	0.736842	0.684211	0.736842	0.578947	0.710526	0.684211	0.868421	0.763158	0.710526	0.710526	0.736842	0.657895	0.684211	0.710526	0.710526	0.710526	0.710526	0.631579	0.736842	0.684211	0.789474	0.736842	0.684211	0.736842	0.736842	0.789474	0.815789	0.736842	0.736842	0.763158	0.815789	0.710526	0.789474	0.868421	0.763158	0.684211	0.789474	0.657895	0.684211	0.736842	0.710526	0.710526	0.684211	0.631579	0.552632
71	0.578947	0.710526	0.710526	0.789474	0.736842	0.684211	0.736842	0.736842	0.552632	0.736842	0.763158	0.868421	0.710526	0.657895	0.789474	0.710526	0.684211	0.710526	0.710526	0.763158	0.657895	0.736842	0.736842	0.631579	0.684211	0.736842	0.736842	0.789474	0.684211	0.736842	0.763158	0.578947	0.789474	0.763158	0.710526	0.763158	0.736842	0.763158	0.710526	0.684211	0.736842	0.710526	0.684211	0.736842	0.710526	0.657895	0.684211	0.736842	0.657895
72	0.631579	0.710526	0.815789	0.842105	0.789474	0.736842	0.684211	0.684211	0.763158	0.736842	0.763158	0.815789	0.710526	0.657895	0.789474	0.657895	0.736842	0.763158	0.710526	0.763158	0.763158	0.631579	0.789474	0.789474	0.736842	0.684211	0.736842	0.684211	0.736842	0.789474	0.763158	0.736842	0.789474	0.710526	0.763158	0.710526	0.684211	0.815789	0.815789	0.736842	0.842105	0.657895	0.736842	0.631579	0.868421	0.710526	0.684211	0.736842	0.710526
73	0.578947	0.763158	0.763158	0.789474	0.736842	0.631579	0.736842	0.578947	0.657895	0.789474	0.763158	0.815789	0.710526	0.605263	0.684211	0.710526	0.631579	0.605263	0.657895	0.710526	0.605263	0.684211	0.736842	0.631579	0.684211	0.736842	0.789474	0.736842	0.631579	0.736842	0.763158	0.684211	0.736842	0.710526	0.815789	0.657895	0.684211	0.710526	0.710526	0.631579	0.736842	0.605263	0.578947	0.736842	0.763158	0.552632	0.684211	0.631579	0.552632
74	0.605263	0.631579	0.789474	0.815789	0.763158	0.657895	0.710526	0.605263	0.578947	0.763158	0.789474	0.684211	0.684211	0.526316	0.657895	0.684211	0.657895	0.631579	0.684211	0.736842	0.631579	0.657895	0.710526	0.657895	0.710526	0.710526	0.657895	0.710526	0.605263	0.710526	0.789474	0.657895	0.710526	0.631579	0.736842	0.631579	0.657895	0.684211	0.684211	0.605263	0.710526	0.631579	0.552632	0.710526	0.736842	0.578947	0.657895	0.657895	0.526316
75	0.684211	0.763158	0.815789	0.842105	0.894737	0.736842	0.789474	0.684211	0.763158	0.789474	0.868421	0.763158	0.815789	0.657895	0.736842	0.763158	0.631579	0.763158	0.815789	0.815789	0.763158	0.736842	0.842105	0.684211	0.789474	0.789474	0.736842	0.736842	0.684211	0.736842	0.710526	0.631579	0.789474	0.763158	0.815789	0.710526	0.736842	0.763158	0.815789	0.736842	0.842105	0.710526	0.736842	0.736842	0.815789	0.763158	0.736842	0.736842	0.605263
76	0.657895	0.684211	0.789474	0.815789	0.815789	0.710526	0.763158	0.657895	0.684211	0.815789	0.789474	0.789474	0.789474	0.578947	0.710526	0.736842	0.710526	0.736842	0.684211	0.736842	0.684211	0.710526	0.815789	0.657895	0.763158	0.763158	0.710526	0.763158	0.657895	0.710526	0.736842	0.605263	0.815789	0.789474	0.789474	0.736842	0.710526	0.736842	0.789474	0.763158	0.815789	0.684211	0.657895	0.710526	0.736842	0.684211	0.710526	0.710526	0.578947
77	0.631579	0.657895	0.710526	0.736842	0.684211	0.631579	0.684211	0.684211	0.657895	0.684211	0.763158	0.763158	0.710526	0.657895	0.684211	0.710526	0.736842	0.657895	0.605263	0.763158	0.605263	0.631579	0.684211	0.578947	0.736842	0.736842	0.684211	0.736842	0.684211	0.736842	0.815789	0.789474	0.736842	0.657895	0.763158	0.710526	0.631579	0.710526	0.710526	0.736842	0.684211	0.710526	0.631579	0.684211	0.657895	0.605263	0.736842	0.684211	0.657895
78	0.631579	0.710526	0.710526	0.736842	0.736842	0.631579	0.684211	0.526316	0.657895	0.736842	0.710526	0.710526	0.657895	0.605263	0.631579	0.605263	0.578947	0.657895	0.657895	0.710526	0.657895	0.578947	0.684211	0.631579	0.684211	0.631579	0.684211	0.631579	0.578947	0.631579	0.657895	0.578947	0.684211	0.657895	0.763158	0.605263	0.631579	0.657895	0.710526	0.684211	0.736842	0.657895	0.631579	0.631579	0.763158	0.605263	0.684211	0.631579	0.552632
79	0.710526	0.789474	0.789474	0.815789	0.815789	0.815789	0.815789	0.657895	0.736842	0.815789	0.842105	0.842105	0.736842	0.631579	0.763158	0.736842	0.657895	0.736842	0.789474	0.789474	0.789474	0.710526	0.763158	0.763158	0.763158	0.710526	0.815789	0.763158	0.710526	0.815789	0.789474	0.763158	0.815789	0.789474	0.947368	0.789474	0.763158	0.789474	0.789474	0.710526	0.815789	0.789474	0.657895	0.763158	0.894737	0.736842	0.763158	0.763158	0.684211
80	0.684211	0.763158	0.763158	0.789474	0.789474	0.789474	0.894737	0.736842	0.710526	0.789474	0.815789	0.763158	0.763158	0.657895	0.842105	0.763158	0.684211	0.763158	0.868421	0.815789	0.868421	0.789474	0.789474	0.789474	0.736842	0.684211	0.789474	0.789474	0.789474	0.842105	0.763158	0.736842	0.789474	0.815789	0.868421	0.815789	0.789474	0.763158	0.815789	0.736842	0.842105	0.868421	0.684211	0.842105	0.815789	0.763158	0.736842	0.789474	0.710526
81	0.605263	0.684211	0.684211	0.657895	0.657895	0.710526	0.763158	0.763158	0.736842	0.657895	0.631579	0.631579	0.684211	0.684211	0.763158	0.631579	0.710526	0.736842	0.684211	0.684211	0.736842	0.657895	0.710526	0.763158	0.657895	0.605263	0.710526	0.657895	0.868421	0.763158	0.631579	0.710526	0.657895	0.684211	0.736842	0.631579	0.657895	0.736842	0.789474	0.763158	0.763158	0.789474	0.710526	0.710526	0.684211	0.684211	0.657895	0.657895	0.684211
82	0.5	0.736842	0.789474	0.710526	0.657895	0.657895	0.710526	0.657895	0.631579	0.657895	0.684211	0.736842	0.578947	0.578947	0.763158	0.578947	0.605263	0.684211	0.736842	0.736842	0.736842	0.657895	0.657895	0.763158	0.605263	0.605263	0.657895	0.657895	0.657895	0.710526	0.736842	0.657895	0.710526	0.631579	0.684211	0.684211	0.657895	0.736842	0.684211	0.605263	0.710526	0.631579	0.657895	0.710526	0.736842	0.631579	0.605263	0.763158	0.684211
83	0.684211	0.710526	0.605263	0.631579	0.684211	0.684211	0.736842	0.526316	0.710526	0.631579	0.763158	0.763158	0.657895	0.710526	0.631579	0.605263	0.631579	0.657895	0.605263	0.605263	0.657895	0.631579	0.684211	0.578947	0.736842	0.736842	0.789474	0.789474	0.684211	0.684211	0.763158	0.684211	0.684211	0.763158	0.815789	0.710526	0.789474	0.815789	0.710526	0.684211	0.736842	0.657895	0.631579	0.789474	0.710526	0.657895	0.684211	0.631579	0.552632
84	0.631579	0.868421	0.763158	0.789474	0.736842	0.684211	0.789474	0.631579	0.710526	0.736842	0.868421	0.868421	0.710526	0.710526	0.789474	0.710526	0.684211	0.710526	0.763158	0.763158	0.657895	0.684211	0.736842	0.684211	0.736842	0.736842	0.789474	0.789474	0.684211	0.789474	0.763158	0.684211	0.789474	0.763158	0.815789	0.710526	0.736842	0.815789	0.763158	0.684211	0.789474	0.657895	0.736842	0.789474	0.763158	0.657895	0.736842	0.684211	0.605263
85	0.710526	0.684211	0.736842	0.710526	0.710526	0.710526	0.710526	0.657895	0.684211	0.763158	0.736842	0.789474	0.736842	0.631579	0.710526	0.684211	0.710526	0.789474	0.684211	0.736842	0.736842	0.657895	0.710526	0.710526	0.763158	0.710526	0.710526	0.710526	0.763158	0.763158	0.736842	0.710526	0.763158	0.789474	0.842105	0.736842	0.710526	0.789474	0.789474	0.763158	0.763158	0.736842	0.657895	0.657895	0.684211	0.684211	0.710526	0.710526	0.684211
87	0.763158	0.789474	0.736842	0.763158	0.763158	0.763158	0.815789	0.657895	0.789474	0.763158	0.842105	0.842105	0.789474	0.684211	0.763158	0.789474	0.710526	0.684211	0.736842	0.736842	0.736842	0.710526	0.763158	0.710526	0.815789	0.763158	0.868421	0.763158	0.763158	0.815789	0.789474	0.815789	0.815789	0.789474		0.789474	0.763158	0.789474	0.842105	0.763158	0.815789	0.789474	0.605263	0.763158	0.842105	0.684211	0.815789	0.710526	0.684211
88	0.657895	0.842105	0.736842	0.763158	0.763158	0.657895	0.815789	0.657895	0.789474	0.815789	0.789474	0.842105	0.789474	0.736842	0.815789	0.736842	0.710526	0.789474	0.736842	0.789474	0.736842	0.710526	0.815789	0.710526	0.763158	0.710526	0.815789	0.763158	0.763158	0.815789	0.736842	0.763158	0.763158	0.789474	0.842105	0.684211	0.710526	0.789474	0.842105	0.763158	0.868421	0.684211	0.710526	0.763158	0.789474	0.631579	0.710526	0.657895	0.684211
89	0.710526	0.736842	0.736842	0.763158	0.763158	0.763158	0.815789	0.605263	0.789474	0.710526	0.842105	0.736842	0.736842	0.684211	0.710526	0.684211	0.710526	0.736842	0.736842	0.684211	0.736842	0.710526	0.763158	0.710526	0.763158	0.710526	0.763158	0.763158	0.763158	0.763158	0.736842	0.657895	0.763158	0.789474	0.842105	0.736842	0.763158	0.789474	0.789474	0.763158	0.815789	0.736842	0.710526	0.763158	0.736842	0.789474	0.763158	0.710526	0.578947
90	0.710526	0.736842	0.631579	0.657895	0.763158	0.763158	0.763158	0.605263	0.789474	0.710526	0.789474	0.789474	0.684211	0.684211	0.657895	0.631579	0.657895	0.736842	0.684211	0.631579	0.684211	0.657895	0.710526	0.605263	0.710526	0.657895	0.763158	0.763158	0.710526	0.710526	0.684211	0.657895	0.763158	0.789474	0.842105	0.736842	0.710526	0.736842	0.736842	0.763158	0.763158	0.736842	0.710526	0.710526	0.736842	0.789474	0.710526	0.710526	0.631579
91	0.710526	0.789474	0.789474	0.815789	0.763158	0.763158	0.815789	0.605263	0.789474	0.710526	0.894737	0.789474	0.736842	0.631579	0.763158	0.736842	0.710526	0.684211	0.789474	0.736842	0.789474	0.710526	0.763158	0.763158	0.763158	0.710526	0.763158	0.763158	0.710526	0.815789	0.842105	0.763158	0.815789	0.789474	0.894737	0.842105	0.763158	0.789474	0.789474	0.710526	0.815789	0.736842	0.657895	0.763158	0.789474	0.789474	0.763158	0.763158	0.631579
92	0.736842	0.710526	0.763158	0.789474	0.842105	0.736842	0.736842	0.631579	0.657895	0.736842	0.815789	0.763158	0.763158	0.710526	0.736842	0.710526	0.736842	0.710526	0.710526	0.710526	0.710526	0.684211	0.736842	0.736842	0.842105	0.842105	0.736842	0.789474	0.631579	0.684211	0.710526	0.631579	0.736842	0.815789	0.763158	0.657895	0.842105	0.815789	0.763158	0.684211	0.789474	0.657895	0.684211	0.789474	0.763158	0.657895	0.684211	0.684211	0.605263
93	0.763158	0.578947	0.684211	0.710526	0.763158	0.868421	0.763158	0.815789	0.684211	0.605263	0.789474	0.684211	0.736842	0.736842	0.815789	0.736842	0.815789	0.684211	0.736842	0.684211	0.736842	0.763158	0.710526	0.763158	0.815789	0.763158	0.763158	0.763158	0.815789	0.763158	0.736842	0.710526	0.763158	0.736842	0.789474	0.736842	0.815789	0.789474	0.789474	0.763158	0.763158	0.842105	0.657895	0.763158	0.789474	0.736842	0.763158	0.763158	0.736842
94	0.657895	0.736842	0.789474	0.763158	0.763158	0.710526	0.815789	0.657895	0.736842	0.763158	0.789474	0.789474	0.684211	0.631579	0.815789	0.684211	0.710526	0.631579	0.736842	0.684211	0.684211	0.710526	0.763158	0.710526	0.710526	0.657895	0.763158	0.710526	0.710526	0.763158	0.684211	0.710526	0.815789	0.684211	0.842105	0.736842	0.710526	0.736842	0.789474	0.710526	0.815789	0.684211	0.605263	0.763158	0.842105	0.631579	0.710526	0.710526	0.631579
95	0.631579	0.710526	0.921053	0.842105	0.736842	0.789474	0.789474	0.684211	0.710526	0.842105	0.763158	0.710526	0.710526	0.5	0.736842	0.710526	0.684211	0.763158	0.815789	0.763158	0.763158	0.736842	0.789474	0.842105	0.736842	0.684211	0.684211	0.684211	0.631579	0.736842	0.657895	0.684211	0.842105	0.657895	0.763158	0.710526	0.684211	0.710526	0.763158	0.684211	0.789474	0.657895	0.684211	0.736842	0.868421	0.657895	0.736842	0.789474	0.657895
96	0.710526	0.736842	0.789474	0.815789	0.710526	0.710526	0.868421	0.710526	0.736842	0.763158	0.789474	0.789474	0.789474	0.684211	0.763158	0.789474	0.710526	0.684211	0.789474	0.684211	0.736842	0.763158	0.763158	0.657895	0.815789	0.815789	0.815789	0.763158	0.710526	0.710526	0.684211	0.710526	0.815789	0.736842	0.842105	0.789474	0.815789	0.736842	0.789474	0.710526	0.763158	0.736842	0.657895	0.868421	0.789474	0.684211	0.815789	0.763158	0.684211
97	0.657895	0.684211	0.789474	0.763158	0.763158	0.710526	0.763158	0.710526	0.684211	0.710526	0.736842	0.736842	0.736842	0.684211	0.763158	0.736842	0.710526	0.684211	0.789474	0.736842	0.789474	0.763158	0.657895	0.763158	0.763158	0.763158	0.763158	0.710526	0.657895	0.657895	0.684211	0.657895	0.710526	0.736842	0.789474	0.736842	0.763158	0.684211	0.736842	0.657895	0.710526	0.736842	0.605263	0.763158	0.736842	0.684211	0.710526	0.815789	0.789474
98	0.763158	0.684211	0.684211	0.710526	0.710526	0.815789	0.868421	0.763158	0.789474	0.710526	0.736842	0.736842	0.789474	0.736842	0.763158	0.789474	0.710526	0.684211	0.736842	0.631579	0.736842	0.815789	0.710526	0.657895	0.815789	0.763158	0.815789	0.710526	0.763158	0.710526	0.684211	0.763158	0.763158	0.736842	0.894737	0.789474	0.815789	0.684211	0.736842	0.710526	0.710526	0.789474	0.605263	0.815789	0.789474	0.736842	0.815789	0.763158	0.789474
99	0.605263	0.736842	0.684211	0.710526	0.710526	0.763158	0.868421	0.763158	0.789474	0.815789	0.736842	0.736842	0.684211	0.684211	0.710526	0.684211	0.657895	0.789474	0.842105	0.684211	0.736842	0.763158	0.710526	0.605263	0.657895	0.605263	0.763158	0.763158	0.657895	0.657895	0.578947	0.657895	0.763158	0.684211	0.736842	0.736842	0.657895	0.578947	0.684211	0.710526	0.710526	0.789474	0.763158	0.815789	0.789474	0.789474	0.710526	0.815789	0.789474
100	0.710526	0.684211	0.684211	0.763158	0.815789	0.868421	0.815789	0.868421	0.736842	0.763158	0.736842	0.789474	0.842105	0.736842	0.815789	0.789474	0.763158	0.947368	0.789474	0.789474	0.789474	0.815789	0.815789	0.710526	0.815789	0.763158	0.763158	0.815789	0.763158	0.763158	0.684211	0.657895	0.815789	0.842105	0.684211	0.736842	0.763158	0.736842	0.789474	0.815789	0.815789	0.789474	0.868421	0.763158	0.789474	0.789474	0.763158	0.815789	0.842105
101	0.605263	0.789474	0.736842	0.710526	0.710526	0.763158	0.815789	0.710526	0.842105	0.763158	0.684211	0.736842	0.736842	0.684211	0.710526	0.684211	0.657895	0.789474	0.736842	0.684211	0.736842	0.710526	0.815789	0.710526	0.710526	0.710526	0.815789	0.763158	0.710526	0.710526	0.578947	0.710526	0.763158	0.736842	0.736842	0.631579	0.710526	0.736842	0.789474	0.763158	0.815789	0.684211	0.815789	0.815789	0.842105	0.684211	0.710526	0.710526	0.684211
102	0.657895	0.684211	0.842105	0.763158	0.710526	0.763158	0.763158	0.710526	0.789474	0.763158	0.789474	0.631579	0.736842	0.631579	0.763158	0.736842	0.763158	0.736842	0.842105	0.736842	0.789474	0.763158	0.763158	0.815789	0.763158	0.710526	0.657895	0.710526	0.605263	0.710526	0.684211	0.763158	0.763158	0.684211	0.684211	0.684211	0.710526	0.684211	0.736842	0.657895	0.763158	0.631579	0.710526	0.763158	0.789474	0.684211	0.657895	0.763158	0.736842
103	0.684211	0.710526	0.657895	0.736842	0.842105	0.789474	0.789474	0.789474	0.710526	0.684211	0.763158	0.763158	0.815789	0.763158	0.842105	0.763158	0.736842	0.868421	0.763158	0.815789	0.763158	0.789474	0.789474	0.736842	0.789474	0.736842	0.789474	0.789474	0.789474	0.789474	0.710526	0.631579	0.736842	0.815789	0.710526	0.657895	0.736842	0.763158	0.815789	0.789474	0.842105	0.763158	0.789474	0.736842	0.763158	0.710526	0.736842	0.736842	0.763158
104	0.684211	0.763158	0.710526	0.736842	0.842105	0.789474	0.736842	0.789474	0.710526	0.684211	0.763158	0.763158	0.815789	0.710526	0.894737	0.763158	0.736842	0.815789	0.763158	0.815789	0.763158	0.736842	0.842105	0.842105	0.789474	0.736842	0.736842	0.736842	0.789474	0.842105	0.710526	0.684211	0.789474	0.815789	0.710526	0.657895	0.736842	0.815789	0.868421	0.789474	0.894737	0.710526	0.789474	0.684211	0.815789	0.657895	0.684211	0.684211	0.710526
106	0.710526	0.789474	0.684211	0.710526	0.763158	0.763158	0.868421	0.657895	0.842105	0.710526	0.842105	0.736842	0.789474	0.736842	0.763158	0.736842	0.710526	0.789474	0.789474	0.736842	0.789474	0.763158	0.815789	0.710526	0.763158	0.710526	0.815789	0.815789	0.815789	0.815789	0.736842	0.710526	0.763158	0.842105	0.842105	0.736842	0.763158	0.789474	0.842105	0.815789	0.868421	0.789474	0.763158	0.815789	0.736842	0.789474	0.763158	0.710526	0.631579
107	0.631579	0.710526	0.710526	0.789474	0.736842	0.842105	0.842105	0.842105	0.710526	0.789474	0.763158	0.815789	0.763158	0.657895	0.789474	0.763158	0.736842	0.921053	0.815789	0.815789	0.763158	0.789474	0.789474	0.684211	0.736842	0.684211	0.789474	0.842105	0.736842	0.789474	0.710526	0.684211	0.842105	0.763158	0.710526	0.763158	0.684211	0.710526	0.763158	0.789474	0.789474	0.815789	0.842105	0.789474	0.815789	0.763158	0.789474	0.842105	0.815789
108	0.684211	0.763158	0.657895	0.736842	0.736842	0.736842	0.842105	0.684211	0.868421	0.736842	0.815789	0.763158	0.815789	0.815789	0.736842	0.763158	0.684211	0.815789	0.815789	0.763158	0.763158	0.789474	0.842105	0.631579	0.789474	0.736842	0.842105	0.789474	0.736842	0.736842	0.657895	0.684211	0.789474	0.763158	0.763158	0.710526	0.736842	0.710526	0.815789	0.842105	0.842105	0.763158	0.842105	0.789474	0.815789	0.763158	0.842105	0.736842	0.710526
109	0.657895	0.842105	0.684211	0.763158	0.763158	0.763158	0.868421	0.710526	0.736842	0.710526	0.842105	0.842105	0.789474	0.736842	0.815789	0.789474	0.763158	0.789474	0.789474	0.789474	0.736842	0.815789	0.815789	0.763158	0.763158	0.763158	0.921053	0.921053	0.763158	0.815789	0.736842	0.657895	0.815789	0.842105	0.789474	0.736842	0.763158	0.789474	0.842105	0.815789	0.868421	0.789474	0.763158	0.868421	0.789474	0.684211	0.815789	0.763158	0.684211
110	0.552632	0.789474	0.631579	0.657895	0.657895	0.763158	0.710526	0.710526	0.736842	0.657895	0.736842	0.789474	0.631579	0.736842	0.763158	0.631579	0.657895	0.736842	0.736842	0.736842	0.684211	0.657895	0.710526	0.710526	0.605263	0.605263	0.815789	0.763158	0.815789	0.868421	0.736842	0.763158	0.710526	0.736842	0.736842	0.631579	0.657895	0.789474	0.736842	0.710526	0.763158	0.736842	0.815789	0.710526	0.789474	0.684211	0.657895	0.657895	0.684211
111	0.552632	0.631579	0.684211	0.657895	0.605263	0.710526	0.605263	0.710526	0.631579	0.657895	0.631579	0.736842	0.631579	0.578947	0.710526	0.631579	0.710526	0.736842	0.684211	0.736842	0.736842	0.605263	0.657895	0.763158	0.605263	0.605263	0.710526	0.710526	0.763158	0.815789	0.736842	0.763158	0.710526	0.736842	0.684211	0.684211	0.605263	0.736842	0.736842	0.710526	0.710526	0.736842	0.710526	0.605263	0.684211	0.631579	0.605263	0.710526	0.736842
112	0.657895	0.684211	0.684211	0.710526	0.710526	0.763158	0.657895	0.657895	0.631579	0.605263	0.842105	0.736842	0.631579	0.631579	0.763158	0.631579	0.657895	0.684211	0.736842	0.736842	0.684211	0.605263	0.710526	0.710526	0.710526	0.657895	0.657895	0.710526	0.763158	0.868421	0.842105	0.763158	0.763158	0.684211	0.736842	0.684211	0.710526	0.842105	0.736842	0.657895	0.763158	0.684211	0.710526	0.657895	0.789474	0.684211	0.657895	0.657895	0.578947
113	0.631579	0.710526	0.763158	0.736842	0.684211	0.736842	0.842105	0.736842	0.657895	0.789474	0.710526	0.710526	0.710526	0.605263	0.789474	0.710526	0.578947	0.815789	0.868421	0.815789	0.868421	0.789474	0.736842	0.736842	0.684211	0.631579	0.684211	0.684211	0.789474	0.842105	0.763158	0.789474	0.736842	0.710526	0.763158	0.763158	0.736842	0.710526	0.710526	0.631579	0.736842	0.763158	0.684211	0.789474	0.763158	0.710526	0.684211	0.789474	0.763158
114	0.736842	0.657895	0.710526	0.736842	0.789474	0.736842	0.736842	0.684211	0.710526	0.736842	0.815789	0.657895	0.815789	0.710526	0.736842	0.763158	0.684211	0.815789	0.868421	0.763158	0.815789	0.789474	0.789474	0.736842	0.842105	0.789474	0.684211	0.736842	0.631579	0.684211	0.657895	0.631579	0.736842	0.763158	0.657895	0.657895	0.789474	0.710526	0.763158	0.684211	0.789474	0.657895	0.736842	0.736842	0.763158	0.710526	0.684211	0.736842	0.710526
115	0.631579	0.657895	0.763158	0.789474	0.736842	0.684211	0.684211	0.578947	0.657895	0.736842	0.763158	0.763158	0.710526	0.552632	0.684211	0.657895	0.736842	0.763158	0.710526	0.710526	0.763158	0.684211	0.736842	0.789474	0.736842	0.684211	0.684211	0.736842	0.684211	0.736842	0.763158	0.631579	0.789474	0.763158	0.710526	0.763158	0.684211	0.710526	0.763158	0.736842	0.789474	0.657895	0.631579	0.631579	0.710526	0.710526	0.684211	0.789474	0.657895
116	0.578947	0.763158	0.763158	0.789474	0.736842	0.684211	0.736842	0.578947	0.657895	0.736842	0.815789	0.763158	0.657895	0.657895	0.684211	0.657895	0.631579	0.657895	0.763158	0.763158	0.657895	0.631579	0.684211	0.684211	0.684211	0.684211	0.736842	0.736842	0.631579	0.736842	0.710526	0.631579	0.736842	0.710526	0.763158	0.657895	0.684211	0.710526	0.710526	0.684211	0.736842	0.710526	0.736842	0.736842	0.763158	0.657895	0.736842	0.684211	0.552632
117	0.657895	0.684211	0.684211	0.657895	0.710526	0.763158	0.710526	0.657895	0.736842	0.657895	0.736842	0.684211	0.736842	0.578947	0.710526	0.684211	0.657895	0.684211	0.684211	0.578947	0.631579	0.657895	0.763158	0.657895	0.763158	0.710526	0.605263	0.657895	0.605263	0.657895	0.631579	0.605263	0.815789	0.736842	0.684211	0.684211	0.710526	0.684211	0.736842	0.710526	0.763158	0.578947	0.710526	0.657895	0.736842	0.736842	0.710526	0.657895	0.578947
118	0.605263	0.736842	0.578947	0.657895	0.657895	0.605263	0.710526	0.605263	0.631579	0.657895	0.789474	0.736842	0.684211	0.789474	0.763158	0.684211	0.710526	0.578947	0.736842	0.631579	0.631579	0.710526	0.657895	0.657895	0.710526	0.710526	0.763158	0.763158	0.605263	0.657895	0.631579	0.605263	0.657895	0.736842	0.684211	0.631579	0.763158	0.684211	0.684211	0.605263	0.710526	0.631579	0.605263	0.763158	0.684211	0.631579	0.657895	0.605263	0.631579
119	0.5	0.684211	0.631579	0.605263	0.605263	0.657895	0.657895	0.657895	0.631579	0.552632	0.631579	0.684211	0.526316	0.684211	0.710526	0.526316	0.657895	0.578947	0.578947	0.578947	0.578947	0.605263	0.552632	0.657895	0.605263	0.605263	0.657895	0.657895	0.605263	0.605263	0.631579	0.657895	0.605263	0.578947	0.631579	0.631579	0.657895	0.684211	0.578947	0.552632	0.605263	0.578947	0.605263	0.710526	0.684211	0.578947	0.552632	0.657895	0.684211
120	0.736842	0.710526	0.815789	0.842105	0.842105	0.789474	0.789474	0.684211	0.710526	0.789474	0.763158	0.763158	0.815789	0.657895	0.736842	0.763158	0.684211	0.763158	0.763158	0.710526	0.763158	0.736842	0.789474	0.736842	0.842105	0.842105	0.736842	0.736842	0.631579	0.684211	0.657895	0.631579	0.789474	0.815789	0.763158	0.710526	0.842105	0.763158	0.763158	0.684211	0.789474	0.657895	0.736842	0.789474	0.815789	0.710526	0.736842	0.736842	0.657895
121	0.710526	0.684211	0.789474	0.868421	0.763158	0.763158	0.763158	0.657895	0.631579	0.763158	0.842105	0.736842	0.736842	0.578947	0.710526	0.736842	0.710526	0.736842	0.789474	0.736842	0.736842	0.710526	0.763158	0.763158	0.815789	0.763158	0.710526	0.763158	0.605263	0.710526	0.736842	0.657895	0.815789	0.684211	0.736842	0.736842	0.763158	0.736842	0.736842	0.657895	0.763158	0.684211	0.657895	0.763158	0.842105	0.684211	0.763158	0.763158	0.631579
122	0.631579	0.657895	0.657895	0.736842	0.789474	0.789474	0.736842	0.736842	0.605263	0.736842	0.763158	0.763158	0.763158	0.605263	0.789474	0.763158	0.736842	0.763158	0.763158	0.763158	0.710526	0.736842	0.736842	0.736842	0.736842	0.684211	0.736842	0.789474	0.631579	0.736842	0.710526	0.578947	0.789474	0.815789	0.710526	0.710526	0.684211	0.657895	0.763158	0.736842	0.789474	0.763158	0.684211	0.684211	0.763158	0.710526	0.736842	0.736842	0.710526
123	0.684211	0.605263	0.657895	0.736842	0.684211	0.736842	0.736842	0.684211	0.763158	0.631579	0.657895	0.657895	0.763158	0.657895	0.631579	0.710526	0.684211	0.763158	0.710526	0.657895	0.815789	0.684211	0.736842	0.684211	0.736842	0.736842	0.789474	0.736842	0.736842	0.684211	0.710526	0.684211	0.684211	0.763158	0.710526	0.710526	0.736842	0.710526	0.763158	0.736842	0.736842	0.763158	0.736842	0.736842	0.710526	0.763158	0.736842	0.736842	0.710526
[truncated: 72 more columns]
