# Supplementary material for: Hybrid purity identification using EST-SSR markers and heterosis analysis of quantitative traits of Russian wildrye
Source: PeerJ. 2022 Nov 30;10:e14442. doi: 10.7717/peerj.14442 (PMC9744169; doi:10.7717/peerj.14442)
Supplement: Supplemental Information 5 — b, Female parent; a, Male parent; 1—143, Hybrids [file peerj-10-14442-s005.xlsx]

## Sheet: Sheet1
Note:b,Female parent;a,Male parent;1—143,Hybrids
Genetic similarity coefficient	a	b	1	2	3	4	5	6	7	8	9	10	11	12	13	14	15	16	17	18	19	20	21	22	23	24	25	26	27	29	30	31	32	33	34	35	36	37	38	39	40	41	42	44	45	46	47	48	49
a
b	0.69697
1	0.69697	0.757576
2	0.69697	0.757576	0.939394
3	0.787879	0.787879	0.848485	0.787879
4	0.878788	0.818182	0.757576	0.69697	0.787879
5	0.848485	0.727273	0.848485	0.848485	0.878788	0.848485
6	0.757576	0.818182	0.757576	0.757576	0.909091	0.818182	0.848485
7	0.848485	0.787879	0.787879	0.727273	0.757576	0.909091	0.818182	0.727273
8	0.69697	0.818182	0.878788	0.818182	0.848485	0.818182	0.848485	0.818182	0.848485
9	0.787879	0.787879	0.909091	0.848485	0.939394	0.848485	0.939394	0.848485	0.818182	0.909091
10	0.848485	0.787879	0.727273	0.727273	0.818182	0.909091	0.818182	0.909091	0.818182	0.787879	0.818182
11	0.787879	0.787879	0.787879	0.787879	0.818182	0.848485	0.757576	0.848485	0.818182	0.848485	0.818182	0.939394
12	0.818182	0.757576	0.818182	0.878788	0.787879	0.818182	0.909091	0.818182	0.848485	0.818182	0.848485	0.848485	0.848485
13	0.818182	0.818182	0.757576	0.757576	0.787879	0.878788	0.727273	0.818182	0.848485	0.818182	0.787879	0.909091	0.969697	0.818182
14	0.878788	0.818182	0.757576	0.757576	0.848485	0.878788	0.848485	0.878788	0.848485	0.757576	0.848485	0.909091	0.848485	0.878788	0.878788
15	0.848485	0.666667	0.848485	0.848485	0.878788	0.787879	0.878788	0.787879	0.818182	0.848485	0.878788	0.818182	0.878788	0.848485	0.848485	0.787879
16	0.757576	0.818182	0.757576	0.818182	0.848485	0.757576	0.909091	0.878788	0.787879	0.818182	0.848485	0.787879	0.727273	0.878788	0.69697	0.818182	0.787879
17	0.727273	0.848485	0.848485	0.787879	0.878788	0.848485	0.878788	0.848485	0.818182	0.969697	0.939394	0.818182	0.818182	0.787879	0.787879	0.787879	0.818182	0.848485
18	0.818182	0.818182	0.757576	0.757576	0.848485	0.878788	0.909091	0.878788	0.787879	0.818182	0.848485	0.787879	0.727273	0.818182	0.757576	0.818182	0.787879	0.878788	0.848485
19	0.727273	0.787879	0.787879	0.727273	0.878788	0.787879	0.818182	0.909091	0.757576	0.848485	0.818182	0.818182	0.757576	0.727273	0.727273	0.787879	0.757576	0.848485	0.878788	0.848485
20	0.787879	0.787879	0.848485	0.848485	0.878788	0.727273	0.878788	0.787879	0.757576	0.848485	0.878788	0.757576	0.757576	0.787879	0.727273	0.787879	0.878788	0.848485	0.878788	0.787879	0.818182
21	0.727273	0.787879	0.909091	0.848485	0.818182	0.787879	0.878788	0.787879	0.878788	0.909091	0.878788	0.757576	0.757576	0.848485	0.727273	0.787879	0.818182	0.848485	0.878788	0.787879	0.818182	0.878788
22	0.939394	0.757576	0.69697	0.69697	0.787879	0.878788	0.848485	0.757576	0.909091	0.757576	0.787879	0.848485	0.787879	0.818182	0.818182	0.878788	0.848485	0.818182	0.787879	0.818182	0.787879	0.848485	0.787879
23	0.878788	0.757576	0.69697	0.69697	0.848485	0.818182	0.787879	0.757576	0.787879	0.69697	0.787879	0.787879	0.787879	0.757576	0.818182	0.818182	0.848485	0.757576	0.727273	0.818182	0.727273	0.787879	0.666667	0.878788
24	0.787879	0.848485	0.787879	0.727273	0.878788	0.848485	0.818182	0.848485	0.757576	0.848485	0.878788	0.757576	0.757576	0.727273	0.787879	0.787879	0.757576	0.787879	0.878788	0.909091	0.818182	0.757576	0.757576	0.727273	0.787879
25	0.878788	0.757576	0.69697	0.69697	0.787879	0.878788	0.787879	0.818182	0.848485	0.757576	0.727273	0.848485	0.848485	0.818182	0.878788	0.818182	0.848485	0.757576	0.727273	0.878788	0.787879	0.727273	0.727273	0.878788	0.878788	0.787879
26	0.848485	0.727273	0.787879	0.727273	0.757576	0.909091	0.818182	0.787879	0.878788	0.848485	0.818182	0.878788	0.878788	0.848485	0.848485	0.787879	0.818182	0.727273	0.818182	0.787879	0.757576	0.69697	0.818182	0.787879	0.727273	0.818182	0.848485
27	0.757576	0.818182	0.818182	0.757576	0.787879	0.878788	0.848485	0.818182	0.909091	0.939394	0.848485	0.787879	0.787879	0.818182	0.818182	0.818182	0.787879	0.818182	0.909091	0.878788	0.848485	0.787879	0.909091	0.818182	0.69697	0.848485	0.818182	0.848485
29	0.878788	0.757576	0.636364	0.636364	0.787879	0.878788	0.787879	0.818182	0.787879	0.69697	0.727273	0.848485	0.787879	0.757576	0.818182	0.818182	0.787879	0.757576	0.727273	0.878788	0.787879	0.727273	0.666667	0.878788	0.878788	0.787879	0.939394	0.787879	0.757576
30	0.818182	0.818182	0.757576	0.69697	0.727273	0.939394	0.787879	0.757576	0.909091	0.818182	0.787879	0.848485	0.787879	0.757576	0.818182	0.818182	0.727273	0.757576	0.848485	0.818182	0.848485	0.727273	0.787879	0.878788	0.757576	0.787879	0.818182	0.848485	0.878788	0.818182
31	0.757576	0.757576	0.757576	0.69697	0.787879	0.757576	0.727273	0.757576	0.848485	0.757576	0.727273	0.787879	0.787879	0.757576	0.757576	0.757576	0.787879	0.757576	0.727273	0.69697	0.787879	0.787879	0.848485	0.818182	0.818182	0.666667	0.818182	0.787879	0.757576	0.757576	0.757576
32	0.69697	0.757576	0.757576	0.757576	0.787879	0.757576	0.848485	0.818182	0.787879	0.878788	0.787879	0.727273	0.727273	0.818182	0.69697	0.69697	0.787879	0.878788	0.848485	0.878788	0.848485	0.787879	0.848485	0.757576	0.69697	0.787879	0.818182	0.787879	0.878788	0.757576	0.757576	0.757576
33	0.787879	0.787879	0.848485	0.787879	0.818182	0.909091	0.818182	0.787879	0.878788	0.909091	0.878788	0.878788	0.939394	0.848485	0.909091	0.787879	0.878788	0.727273	0.878788	0.787879	0.757576	0.757576	0.818182	0.787879	0.787879	0.818182	0.848485	0.939394	0.848485	0.787879	0.848485	0.787879	0.787879
34	0.69697	0.757576	0.878788	0.818182	0.848485	0.757576	0.787879	0.818182	0.666667	0.818182	0.848485	0.787879	0.787879	0.69697	0.757576	0.757576	0.787879	0.69697	0.848485	0.757576	0.848485	0.848485	0.787879	0.69697	0.69697	0.787879	0.69697	0.727273	0.757576	0.69697	0.757576	0.69697	0.69697	0.787879
35	0.878788	0.757576	0.757576	0.757576	0.848485	0.878788	0.909091	0.878788	0.787879	0.818182	0.848485	0.848485	0.787879	0.818182	0.818182	0.878788	0.848485	0.818182	0.848485	0.939394	0.848485	0.848485	0.787879	0.878788	0.818182	0.848485	0.878788	0.787879	0.878788	0.878788	0.818182	0.69697	0.818182	0.787879	0.818182
36	0.848485	0.787879	0.848485	0.848485	0.878788	0.848485	0.939394	0.787879	0.818182	0.848485	0.939394	0.757576	0.757576	0.848485	0.787879	0.848485	0.878788	0.848485	0.878788	0.909091	0.757576	0.878788	0.818182	0.848485	0.848485	0.878788	0.787879	0.757576	0.848485	0.787879	0.787879	0.666667	0.787879	0.818182	0.787879	0.909091
37	0.909091	0.787879	0.727273	0.727273	0.818182	0.909091	0.878788	0.787879	0.878788	0.727273	0.818182	0.818182	0.757576	0.848485	0.787879	0.848485	0.818182	0.848485	0.757576	0.909091	0.757576	0.757576	0.757576	0.909091	0.909091	0.818182	0.909091	0.818182	0.787879	0.909091	0.848485	0.787879	0.787879	0.818182	0.666667	0.848485	0.878788
38	0.727273	0.848485	0.848485	0.848485	0.818182	0.787879	0.818182	0.787879	0.757576	0.848485	0.818182	0.69697	0.757576	0.787879	0.787879	0.727273	0.818182	0.787879	0.818182	0.909091	0.757576	0.818182	0.818182	0.727273	0.787879	0.878788	0.848485	0.757576	0.848485	0.787879	0.727273	0.727273	0.848485	0.818182	0.787879	0.848485	0.878788	0.818182
39	0.757576	0.69697	0.818182	0.757576	0.787879	0.757576	0.787879	0.757576	0.787879	0.757576	0.787879	0.727273	0.727273	0.757576	0.757576	0.818182	0.787879	0.69697	0.727273	0.757576	0.727273	0.787879	0.848485	0.757576	0.757576	0.727273	0.757576	0.727273	0.818182	0.69697	0.69697	0.818182	0.69697	0.727273	0.818182	0.818182	0.787879	0.727273	0.787879
40	0.757576	0.818182	0.69697	0.69697	0.848485	0.757576	0.787879	0.878788	0.787879	0.757576	0.787879	0.787879	0.727273	0.757576	0.757576	0.878788	0.727273	0.878788	0.787879	0.818182	0.848485	0.787879	0.787879	0.818182	0.818182	0.787879	0.757576	0.666667	0.818182	0.757576	0.757576	0.818182	0.757576	0.666667	0.69697	0.818182	0.787879	0.787879	0.727273	0.818182
41	0.727273	0.848485	0.787879	0.787879	0.878788	0.787879	0.818182	0.969697	0.69697	0.787879	0.818182	0.878788	0.818182	0.787879	0.787879	0.848485	0.757576	0.848485	0.818182	0.848485	0.878788	0.818182	0.818182	0.727273	0.727273	0.818182	0.787879	0.757576	0.787879	0.787879	0.727273	0.787879	0.787879	0.757576	0.848485	0.848485	0.757576	0.757576	0.818182	0.787879	0.848485
42	0.757576	0.69697	0.69697	0.69697	0.848485	0.636364	0.787879	0.757576	0.666667	0.757576	0.787879	0.666667	0.666667	0.69697	0.636364	0.69697	0.787879	0.818182	0.787879	0.757576	0.787879	0.848485	0.727273	0.757576	0.818182	0.787879	0.69697	0.666667	0.69697	0.69697	0.636364	0.757576	0.757576	0.666667	0.757576	0.757576	0.787879	0.727273	0.727273	0.757576	0.818182	0.727273
44	0.909091	0.727273	0.787879	0.727273	0.757576	0.909091	0.818182	0.727273	0.939394	0.787879	0.818182	0.818182	0.818182	0.848485	0.848485	0.848485	0.818182	0.727273	0.757576	0.787879	0.69697	0.69697	0.818182	0.848485	0.787879	0.818182	0.848485	0.939394	0.848485	0.787879	0.848485	0.787879	0.727273	0.878788	0.666667	0.787879	0.818182	0.878788	0.757576	0.787879	0.727273	0.69697	0.666667
45	0.818182	0.69697	0.757576	0.757576	0.909091	0.757576	0.909091	0.878788	0.727273	0.757576	0.848485	0.787879	0.727273	0.818182	0.69697	0.818182	0.848485	0.878788	0.787879	0.878788	0.848485	0.848485	0.787879	0.818182	0.878788	0.787879	0.818182	0.727273	0.757576	0.818182	0.69697	0.818182	0.818182	0.727273	0.757576	0.878788	0.848485	0.848485	0.787879	0.818182	0.878788	0.848485	0.878788	0.727273
46	0.787879	0.787879	0.787879	0.727273	0.939394	0.787879	0.818182	0.848485	0.757576	0.787879	0.878788	0.757576	0.757576	0.727273	0.787879	0.848485	0.818182	0.787879	0.818182	0.848485	0.818182	0.818182	0.757576	0.787879	0.909091	0.878788	0.787879	0.69697	0.787879	0.787879	0.727273	0.787879	0.727273	0.757576	0.787879	0.848485	0.878788	0.818182	0.818182	0.848485	0.909091	0.818182	0.848485	0.757576	0.909091
47	0.818182	0.818182	0.818182	0.818182	0.909091	0.757576	0.848485	0.818182	0.727273	0.757576	0.848485	0.727273	0.727273	0.757576	0.757576	0.818182	0.848485	0.818182	0.787879	0.878788	0.787879	0.909091	0.787879	0.818182	0.878788	0.848485	0.818182	0.666667	0.757576	0.818182	0.69697	0.757576	0.757576	0.727273	0.818182	0.878788	0.909091	0.848485	0.909091	0.818182	0.818182	0.848485	0.818182	0.727273	0.878788	0.909091
48	0.787879	0.787879	0.848485	0.787879	0.878788	0.909091	0.939394	0.909091	0.818182	0.909091	0.939394	0.878788	0.818182	0.848485	0.787879	0.848485	0.818182	0.848485	0.939394	0.909091	0.878788	0.818182	0.878788	0.787879	0.727273	0.878788	0.787879	0.878788	0.909091	0.787879	0.848485	0.727273	0.848485	0.878788	0.848485	0.909091	0.878788	0.818182	0.818182	0.787879	0.787879	0.878788	0.727273	0.818182	0.848485	0.818182	0.787879
49	0.818182	0.878788	0.69697	0.69697	0.848485	0.878788	0.727273	0.878788	0.787879	0.757576	0.787879	0.909091	0.909091	0.757576	0.939394	0.878788	0.787879	0.757576	0.787879	0.818182	0.787879	0.727273	0.666667	0.818182	0.878788	0.848485	0.878788	0.787879	0.757576	0.878788	0.818182	0.757576	0.69697	0.848485	0.757576	0.818182	0.787879	0.848485	0.787879	0.69697	0.818182	0.848485	0.69697	0.787879	0.757576	0.848485	0.818182	0.787879
50	0.787879	0.848485	0.787879	0.787879	0.878788	0.848485	0.818182	0.909091	0.757576	0.848485	0.878788	0.878788	0.878788	0.787879	0.909091	0.909091	0.818182	0.787879	0.878788	0.848485	0.818182	0.818182	0.757576	0.787879	0.787879	0.878788	0.787879	0.757576	0.848485	0.787879	0.787879	0.666667	0.727273	0.818182	0.848485	0.909091	0.878788	0.757576	0.818182	0.787879	0.848485	0.878788	0.727273	0.757576	0.787879	0.878788	0.848485	0.878788	0.909091
51	0.818182	0.757576	0.69697	0.69697	0.787879	0.757576	0.787879	0.818182	0.666667	0.69697	0.727273	0.727273	0.666667	0.69697	0.69697	0.757576	0.727273	0.757576	0.727273	0.878788	0.787879	0.787879	0.727273	0.757576	0.757576	0.848485	0.818182	0.727273	0.757576	0.878788	0.69697	0.69697	0.757576	0.666667	0.757576	0.878788	0.787879	0.787879	0.848485	0.757576	0.757576	0.848485	0.757576	0.727273	0.818182	0.787879	0.878788	0.787879	0.757576
52	0.727273	0.909091	0.848485	0.848485	0.878788	0.787879	0.818182	0.848485	0.757576	0.787879	0.878788	0.757576	0.757576	0.787879	0.787879	0.848485	0.757576	0.848485	0.818182	0.848485	0.757576	0.818182	0.818182	0.727273	0.787879	0.878788	0.727273	0.69697	0.787879	0.727273	0.727273	0.727273	0.727273	0.757576	0.787879	0.787879	0.878788	0.818182	0.878788	0.787879	0.848485	0.878788	0.727273	0.757576	0.787879	0.878788	0.909091	0.818182	0.848485
53	0.848485	0.787879	0.787879	0.727273	0.818182	0.909091	0.878788	0.848485	0.818182	0.848485	0.878788	0.818182	0.757576	0.787879	0.787879	0.848485	0.757576	0.787879	0.878788	0.909091	0.818182	0.757576	0.818182	0.787879	0.727273	0.939394	0.787879	0.878788	0.909091	0.787879	0.848485	0.666667	0.787879	0.818182	0.787879	0.909091	0.878788	0.818182	0.818182	0.787879	0.787879	0.818182	0.727273	0.878788	0.787879	0.818182	0.787879	0.939394	0.787879
54	0.818182	0.757576	0.818182	0.818182	0.848485	0.818182	0.848485	0.757576	0.848485	0.818182	0.848485	0.787879	0.848485	0.878788	0.818182	0.757576	0.909091	0.818182	0.787879	0.818182	0.727273	0.787879	0.787879	0.818182	0.878788	0.787879	0.878788	0.848485	0.757576	0.818182	0.757576	0.818182	0.818182	0.909091	0.69697	0.757576	0.848485	0.909091	0.848485	0.69697	0.69697	0.727273	0.757576	0.848485	0.818182	0.787879	0.818182	0.787879	0.818182
55	0.848485	0.727273	0.848485	0.787879	0.818182	0.848485	0.818182	0.787879	0.878788	0.787879	0.818182	0.878788	0.878788	0.848485	0.848485	0.848485	0.878788	0.727273	0.757576	0.727273	0.757576	0.818182	0.878788	0.848485	0.787879	0.69697	0.848485	0.878788	0.787879	0.787879	0.787879	0.909091	0.727273	0.878788	0.787879	0.787879	0.757576	0.818182	0.757576	0.848485	0.727273	0.818182	0.666667	0.878788	0.787879	0.757576	0.787879	0.818182	0.787879
56	0.878788	0.757576	0.757576	0.757576	0.848485	0.818182	0.787879	0.757576	0.848485	0.757576	0.787879	0.787879	0.848485	0.818182	0.878788	0.818182	0.909091	0.757576	0.727273	0.818182	0.727273	0.787879	0.727273	0.878788	0.939394	0.787879	0.939394	0.787879	0.757576	0.878788	0.757576	0.818182	0.757576	0.848485	0.69697	0.818182	0.848485	0.909091	0.848485	0.757576	0.757576	0.727273	0.757576	0.848485	0.818182	0.848485	0.878788	0.727273	0.878788
57	0.848485	0.727273	0.787879	0.727273	0.878788	0.848485	0.878788	0.848485	0.818182	0.787879	0.878788	0.818182	0.757576	0.787879	0.787879	0.909091	0.818182	0.787879	0.818182	0.848485	0.818182	0.818182	0.818182	0.848485	0.848485	0.818182	0.787879	0.757576	0.848485	0.787879	0.787879	0.787879	0.727273	0.757576	0.787879	0.909091	0.878788	0.818182	0.757576	0.909091	0.909091	0.818182	0.787879	0.818182	0.909091	0.939394	0.848485	0.878788	0.787879
58	0.818182	0.818182	0.757576	0.69697	0.787879	0.939394	0.848485	0.818182	0.909091	0.878788	0.848485	0.848485	0.787879	0.757576	0.818182	0.818182	0.787879	0.818182	0.909091	0.878788	0.848485	0.787879	0.848485	0.878788	0.757576	0.848485	0.818182	0.848485	0.939394	0.818182	0.939394	0.757576	0.818182	0.848485	0.757576	0.878788	0.848485	0.848485	0.787879	0.757576	0.818182	0.787879	0.69697	0.848485	0.757576	0.787879	0.757576	0.909091	0.818182
59	0.787879	0.848485	0.727273	0.666667	0.818182	0.909091	0.818182	0.848485	0.878788	0.848485	0.818182	0.818182	0.757576	0.727273	0.787879	0.787879	0.757576	0.848485	0.878788	0.909091	0.878788	0.757576	0.818182	0.848485	0.787879	0.878788	0.848485	0.818182	0.909091	0.848485	0.909091	0.787879	0.848485	0.818182	0.727273	0.848485	0.818182	0.878788	0.818182	0.727273	0.848485	0.818182	0.727273	0.818182	0.787879	0.818182	0.787879	0.878788	0.848485
60	0.848485	0.787879	0.848485	0.787879	0.878788	0.909091	0.878788	0.787879	0.878788	0.848485	0.939394	0.878788	0.878788	0.848485	0.848485	0.848485	0.878788	0.787879	0.878788	0.787879	0.757576	0.818182	0.818182	0.848485	0.848485	0.818182	0.787879	0.878788	0.787879	0.787879	0.848485	0.787879	0.727273	0.939394	0.787879	0.787879	0.878788	0.878788	0.757576	0.727273	0.727273	0.757576	0.727273	0.878788	0.787879	0.818182	0.787879	0.878788	0.848485
61	0.727273	0.787879	0.848485	0.787879	0.939394	0.787879	0.878788	0.848485	0.757576	0.848485	0.939394	0.757576	0.757576	0.787879	0.727273	0.787879	0.818182	0.848485	0.878788	0.848485	0.818182	0.818182	0.818182	0.727273	0.848485	0.878788	0.727273	0.757576	0.787879	0.727273	0.727273	0.787879	0.787879	0.818182	0.787879	0.787879	0.878788	0.818182	0.818182	0.787879	0.848485	0.818182	0.848485	0.757576	0.909091	0.939394	0.848485	0.878788	0.787879
62	0.848485	0.848485	0.727273	0.727273	0.878788	0.848485	0.757576	0.848485	0.818182	0.727273	0.818182	0.878788	0.878788	0.787879	0.909091	0.909091	0.818182	0.787879	0.757576	0.787879	0.757576	0.757576	0.69697	0.848485	0.909091	0.818182	0.848485	0.757576	0.727273	0.848485	0.787879	0.787879	0.666667	0.818182	0.727273	0.787879	0.818182	0.878788	0.757576	0.727273	0.848485	0.818182	0.727273	0.818182	0.787879	0.878788	0.848485	0.757576	0.969697
63	0.848485	0.787879	0.787879	0.727273	0.939394	0.848485	0.818182	0.848485	0.818182	0.787879	0.878788	0.878788	0.878788	0.787879	0.848485	0.848485	0.878788	0.787879	0.818182	0.787879	0.818182	0.818182	0.757576	0.848485	0.909091	0.818182	0.848485	0.818182	0.727273	0.848485	0.787879	0.848485	0.727273	0.878788	0.787879	0.787879	0.818182	0.878788	0.757576	0.727273	0.787879	0.818182	0.787879	0.818182	0.848485	0.878788	0.848485	0.818182	0.909091
64	0.787879	0.666667	0.848485	0.848485	0.878788	0.727273	0.878788	0.787879	0.757576	0.848485	0.878788	0.757576	0.818182	0.848485	0.787879	0.787879	0.939394	0.787879	0.818182	0.787879	0.757576	0.878788	0.818182	0.787879	0.848485	0.757576	0.787879	0.757576	0.787879	0.727273	0.666667	0.787879	0.787879	0.818182	0.787879	0.848485	0.878788	0.757576	0.818182	0.848485	0.787879	0.757576	0.848485	0.757576	0.909091	0.878788	0.848485	0.818182	0.727273
65	0.909091	0.787879	0.787879	0.787879	0.757576	0.909091	0.878788	0.727273	0.878788	0.727273	0.818182	0.818182	0.757576	0.848485	0.787879	0.848485	0.818182	0.787879	0.757576	0.848485	0.69697	0.818182	0.818182	0.909091	0.848485	0.757576	0.848485	0.818182	0.787879	0.848485	0.848485	0.787879	0.727273	0.818182	0.727273	0.848485	0.878788	0.939394	0.818182	0.787879	0.727273	0.757576	0.666667	0.878788	0.787879	0.757576	0.848485	0.818182	0.787879
66	0.787879	0.848485	0.787879	0.727273	0.878788	0.848485	0.818182	0.787879	0.878788	0.848485	0.878788	0.818182	0.818182	0.787879	0.787879	0.787879	0.818182	0.848485	0.878788	0.787879	0.818182	0.818182	0.818182	0.848485	0.848485	0.818182	0.787879	0.818182	0.787879	0.787879	0.848485	0.848485	0.787879	0.878788	0.727273	0.727273	0.818182	0.878788	0.757576	0.666667	0.787879	0.757576	0.787879	0.818182	0.787879	0.818182	0.787879	0.818182	0.848485
67	0.848485	0.848485	0.727273	0.727273	0.757576	0.909091	0.818182	0.787879	0.818182	0.727273	0.757576	0.818182	0.757576	0.787879	0.787879	0.787879	0.757576	0.787879	0.757576	0.909091	0.757576	0.757576	0.757576	0.848485	0.848485	0.818182	0.909091	0.818182	0.787879	0.909091	0.848485	0.787879	0.787879	0.818182	0.727273	0.848485	0.818182	0.939394	0.878788	0.727273	0.727273	0.818182	0.666667	0.818182	0.787879	0.757576	0.848485	0.818182	0.848485
68	0.878788	0.757576	0.69697	0.69697	0.787879	0.878788	0.787879	0.818182	0.848485	0.757576	0.727273	0.848485	0.848485	0.818182	0.878788	0.818182	0.848485	0.757576	0.727273	0.878788	0.787879	0.727273	0.727273	0.878788	0.878788	0.787879	1	0.848485	0.818182	0.939394	0.818182	0.818182	0.818182	0.848485	0.69697	0.878788	0.787879	0.909091	0.848485	0.757576	0.757576	0.787879	0.69697	0.848485	0.818182	0.787879	0.818182	0.787879	0.878788
69	0.818182	0.878788	0.757576	0.69697	0.848485	0.878788	0.787879	0.757576	0.909091	0.818182	0.848485	0.787879	0.787879	0.757576	0.818182	0.818182	0.787879	0.818182	0.848485	0.818182	0.787879	0.787879	0.787879	0.878788	0.878788	0.848485	0.818182	0.787879	0.818182	0.818182	0.878788	0.818182	0.757576	0.848485	0.69697	0.757576	0.848485	0.909091	0.787879	0.69697	0.818182	0.727273	0.757576	0.848485	0.757576	0.848485	0.818182	0.787879	0.878788
70	0.818182	0.878788	0.69697	0.69697	0.787879	0.878788	0.787879	0.757576	0.848485	0.818182	0.787879	0.787879	0.787879	0.757576	0.818182	0.757576	0.787879	0.818182	0.848485	0.878788	0.787879	0.787879	0.727273	0.878788	0.878788	0.848485	0.878788	0.787879	0.818182	0.878788	0.878788	0.757576	0.818182	0.848485	0.69697	0.818182	0.848485	0.909091	0.848485	0.636364	0.757576	0.727273	0.757576	0.787879	0.757576	0.787879	0.818182	0.787879	0.878788
71	0.69697	0.69697	0.818182	0.818182	0.787879	0.757576	0.848485	0.818182	0.727273	0.818182	0.787879	0.727273	0.727273	0.818182	0.69697	0.69697	0.787879	0.818182	0.787879	0.878788	0.848485	0.727273	0.787879	0.69697	0.757576	0.787879	0.818182	0.787879	0.818182	0.757576	0.757576	0.757576	0.878788	0.787879	0.757576	0.818182	0.787879	0.787879	0.848485	0.757576	0.757576	0.787879	0.757576	0.727273	0.878788	0.787879	0.757576	0.848485	0.69697
72	0.818182	0.818182	0.878788	0.818182	0.787879	0.878788	0.787879	0.69697	0.909091	0.818182	0.848485	0.787879	0.848485	0.818182	0.878788	0.818182	0.848485	0.69697	0.787879	0.757576	0.666667	0.787879	0.848485	0.818182	0.818182	0.787879	0.818182	0.848485	0.818182	0.757576	0.818182	0.818182	0.69697	0.909091	0.757576	0.757576	0.848485	0.848485	0.848485	0.818182	0.69697	0.727273	0.636364	0.909091	0.69697	0.787879	0.818182	0.787879	0.818182
73	0.727273	0.848485	0.909091	0.848485	0.878788	0.787879	0.878788	0.787879	0.818182	0.909091	0.939394	0.757576	0.757576	0.787879	0.727273	0.787879	0.818182	0.848485	0.939394	0.787879	0.818182	0.939394	0.939394	0.787879	0.727273	0.818182	0.666667	0.757576	0.848485	0.666667	0.787879	0.787879	0.787879	0.818182	0.848485	0.787879	0.878788	0.757576	0.818182	0.787879	0.787879	0.818182	0.787879	0.757576	0.787879	0.818182	0.848485	0.878788	0.727273
74	0.787879	0.787879	0.787879	0.727273	0.818182	0.787879	0.69697	0.727273	0.878788	0.787879	0.757576	0.757576	0.818182	0.727273	0.848485	0.787879	0.818182	0.727273	0.757576	0.727273	0.818182	0.757576	0.757576	0.848485	0.848485	0.757576	0.848485	0.757576	0.787879	0.787879	0.848485	0.848485	0.727273	0.818182	0.727273	0.727273	0.757576	0.818182	0.757576	0.727273	0.787879	0.69697	0.727273	0.818182	0.727273	0.818182	0.787879	0.69697	0.848485
76	0.69697	0.757576	0.878788	0.818182	0.909091	0.757576	0.848485	0.818182	0.787879	0.878788	0.909091	0.727273	0.787879	0.818182	0.757576	0.757576	0.848485	0.818182	0.848485	0.818182	0.787879	0.787879	0.848485	0.69697	0.818182	0.848485	0.757576	0.787879	0.818182	0.69697	0.69697	0.818182	0.818182	0.848485	0.757576	0.757576	0.848485	0.787879	0.848485	0.818182	0.818182	0.787879	0.818182	0.787879	0.878788	0.909091	0.818182	0.848485	0.757576
77	0.787879	0.787879	0.848485	0.787879	0.818182	0.848485	0.878788	0.787879	0.878788	0.848485	0.878788	0.818182	0.757576	0.787879	0.727273	0.787879	0.818182	0.848485	0.878788	0.787879	0.818182	0.878788	0.939394	0.848485	0.727273	0.757576	0.727273	0.818182	0.848485	0.727273	0.848485	0.848485	0.787879	0.818182	0.787879	0.787879	0.818182	0.818182	0.757576	0.787879	0.787879	0.818182	0.727273	0.818182	0.787879	0.757576	0.787879	0.878788	0.727273
78	0.787879	0.727273	0.909091	0.848485	0.878788	0.787879	0.818182	0.787879	0.818182	0.848485	0.878788	0.818182	0.878788	0.787879	0.848485	0.787879	0.939394	0.727273	0.818182	0.727273	0.757576	0.878788	0.878788	0.787879	0.787879	0.757576	0.787879	0.818182	0.787879	0.727273	0.727273	0.848485	0.727273	0.878788	0.848485	0.787879	0.818182	0.757576	0.818182	0.848485	0.727273	0.818182	0.727273	0.818182	0.787879	0.818182	0.848485	0.818182	0.787879
79	0.69697	0.818182	0.818182	0.757576	0.787879	0.757576	0.787879	0.757576	0.848485	0.818182	0.787879	0.666667	0.666667	0.757576	0.69697	0.757576	0.727273	0.818182	0.787879	0.818182	0.787879	0.787879	0.909091	0.757576	0.757576	0.787879	0.757576	0.727273	0.878788	0.69697	0.757576	0.878788	0.818182	0.727273	0.69697	0.757576	0.787879	0.787879	0.848485	0.878788	0.878788	0.787879	0.757576	0.787879	0.818182	0.848485	0.818182	0.787879	0.69697
80	0.757576	0.757576	0.818182	0.757576	0.787879	0.818182	0.727273	0.757576	0.848485	0.878788	0.787879	0.848485	0.909091	0.757576	0.878788	0.757576	0.848485	0.69697	0.848485	0.69697	0.848485	0.787879	0.787879	0.818182	0.757576	0.727273	0.818182	0.848485	0.818182	0.757576	0.878788	0.818182	0.757576	0.909091	0.818182	0.757576	0.727273	0.727273	0.727273	0.69697	0.69697	0.727273	0.69697	0.787879	0.69697	0.727273	0.69697	0.787879	0.818182
81	0.848485	0.787879	0.787879	0.787879	0.878788	0.787879	0.878788	0.787879	0.818182	0.848485	0.878788	0.757576	0.757576	0.787879	0.787879	0.848485	0.878788	0.848485	0.878788	0.848485	0.818182	0.939394	0.818182	0.909091	0.848485	0.818182	0.787879	0.69697	0.848485	0.787879	0.787879	0.727273	0.787879	0.757576	0.787879	0.909091	0.939394	0.818182	0.818182	0.787879	0.848485	0.757576	0.848485	0.757576	0.848485	0.878788	0.909091	0.818182	0.787879
82	0.787879	0.848485	0.787879	0.727273	0.818182	0.909091	0.878788	0.848485	0.878788	0.909091	0.878788	0.818182	0.757576	0.787879	0.787879	0.848485	0.757576	0.848485	0.939394	0.909091	0.878788	0.818182	0.878788	0.848485	0.727273	0.878788	0.787879	0.818182	0.969697	0.787879	0.909091	0.727273	0.848485	0.818182	0.787879	0.909091	0.878788	0.818182	0.818182	0.787879	0.848485	0.818182	0.727273	0.818182	0.787879	0.818182	0.787879	0.939394	0.787879
83	0.727273	0.787879	0.787879	0.787879	0.818182	0.727273	0.818182	0.848485	0.757576	0.848485	0.757576	0.757576	0.757576	0.787879	0.727273	0.727273	0.818182	0.848485	0.818182	0.848485	0.878788	0.878788	0.878788	0.787879	0.727273	0.757576	0.848485	0.757576	0.848485	0.787879	0.727273	0.848485	0.909091	0.757576	0.787879	0.848485	0.757576	0.757576	0.878788	0.787879	0.787879	0.878788	0.787879	0.69697	0.848485	0.757576	0.848485	0.818182	0.727273
84	0.878788	0.69697	0.757576	0.69697	0.787879	0.878788	0.787879	0.757576	0.909091	0.757576	0.787879	0.848485	0.848485	0.818182	0.878788	0.878788	0.848485	0.69697	0.727273	0.757576	0.727273	0.727273	0.787879	0.878788	0.818182	0.727273	0.878788	0.848485	0.818182	0.878788	0.818182	0.818182	0.69697	0.848485	0.69697	0.818182	0.787879	0.848485	0.727273	0.818182	0.757576	0.727273	0.636364	0.909091	0.757576	0.787879	0.757576	0.787879	0.818182
85	0.69697	0.818182	0.818182	0.757576	0.848485	0.818182	0.787879	0.818182	0.787879	0.878788	0.848485	0.727273	0.787879	0.757576	0.818182	0.757576	0.787879	0.757576	0.848485	0.878788	0.787879	0.727273	0.787879	0.69697	0.757576	0.909091	0.818182	0.787879	0.878788	0.818182	0.757576	0.69697	0.818182	0.848485	0.757576	0.818182	0.848485	0.787879	0.909091	0.757576	0.757576	0.787879	0.69697	0.787879	0.757576	0.848485	0.818182	0.848485	0.818182
86	0.787879	0.787879	0.727273	0.727273	0.818182	0.787879	0.757576	0.787879	0.818182	0.848485	0.757576	0.818182	0.878788	0.787879	0.848485	0.727273	0.878788	0.787879	0.818182	0.787879	0.818182	0.818182	0.757576	0.848485	0.848485	0.757576	0.909091	0.818182	0.787879	0.848485	0.787879	0.848485	0.848485	0.878788	0.727273	0.787879	0.757576	0.818182	0.818182	0.666667	0.727273	0.757576	0.787879	0.757576	0.787879	0.757576	0.787879	0.757576	0.848485
87	0.818182	0.69697	0.818182	0.757576	0.787879	0.878788	0.848485	0.757576	0.909091	0.818182	0.848485	0.848485	0.848485	0.878788	0.818182	0.818182	0.848485	0.757576	0.787879	0.757576	0.727273	0.727273	0.848485	0.818182	0.818182	0.727273	0.818182	0.909091	0.818182	0.757576	0.818182	0.878788	0.757576	0.909091	0.69697	0.757576	0.787879	0.848485	0.727273	0.818182	0.757576	0.727273	0.69697	0.909091	0.818182	0.787879	0.69697	0.848485	0.757576
88	0.878788	0.757576	0.818182	0.818182	0.787879	0.878788	0.909091	0.757576	0.848485	0.757576	0.848485	0.848485	0.787879	0.878788	0.757576	0.818182	0.848485	0.818182	0.787879	0.818182	0.727273	0.848485	0.848485	0.878788	0.818182	0.727273	0.818182	0.848485	0.757576	0.818182	0.818182	0.818182	0.757576	0.848485	0.757576	0.818182	0.848485	0.909091	0.787879	0.757576	0.69697	0.787879	0.69697	0.848485	0.818182	0.727273	0.818182	0.848485	0.757576
89	0.848485	0.787879	0.787879	0.787879	0.878788	0.848485	0.878788	0.848485	0.757576	0.848485	0.878788	0.818182	0.818182	0.787879	0.848485	0.848485	0.878788	0.787879	0.878788	0.909091	0.818182	0.878788	0.757576	0.848485	0.848485	0.878788	0.848485	0.757576	0.848485	0.848485	0.787879	0.666667	0.787879	0.818182	0.848485	0.969697	0.939394	0.818182	0.878788	0.787879	0.787879	0.818182	0.787879	0.757576	0.848485	0.878788	0.909091	0.878788	0.848485
90	0.787879	0.727273	0.787879	0.787879	0.878788	0.727273	0.818182	0.787879	0.757576	0.787879	0.818182	0.69697	0.757576	0.787879	0.787879	0.787879	0.878788	0.787879	0.757576	0.848485	0.757576	0.818182	0.757576	0.787879	0.909091	0.818182	0.848485	0.69697	0.787879	0.787879	0.666667	0.787879	0.787879	0.757576	0.727273	0.848485	0.878788	0.818182	0.878788	0.848485	0.848485	0.757576	0.848485	0.757576	0.909091	0.939394	0.909091	0.757576	0.787879
91	0.848485	0.787879	0.848485	0.787879	0.878788	0.909091	0.878788	0.787879	0.878788	0.848485	0.939394	0.878788	0.878788	0.848485	0.848485	0.848485	0.878788	0.787879	0.878788	0.787879	0.757576	0.818182	0.818182	0.848485	0.848485	0.818182	0.787879	0.878788	0.787879	0.787879	0.848485	0.787879	0.727273	0.939394	0.787879	0.787879	0.878788	0.878788	0.757576	0.727273	0.727273	0.757576	0.727273	0.878788	0.787879	0.818182	0.787879	0.878788	0.848485
92	0.727273	0.727273	0.848485	0.848485	0.878788	0.727273	0.878788	0.787879	0.757576	0.848485	0.878788	0.69697	0.757576	0.848485	0.727273	0.727273	0.878788	0.848485	0.818182	0.848485	0.757576	0.818182	0.818182	0.727273	0.848485	0.818182	0.787879	0.757576	0.787879	0.727273	0.666667	0.787879	0.848485	0.818182	0.727273	0.787879	0.878788	0.818182	0.878788	0.787879	0.787879	0.757576	0.848485	0.757576	0.909091	0.878788	0.848485	0.818182	0.727273
93	0.69697	0.757576	0.818182	0.818182	0.848485	0.69697	0.848485	0.757576	0.787879	0.878788	0.848485	0.666667	0.727273	0.818182	0.69697	0.69697	0.848485	0.878788	0.848485	0.818182	0.787879	0.848485	0.848485	0.757576	0.818182	0.787879	0.757576	0.727273	0.818182	0.69697	0.69697	0.818182	0.878788	0.787879	0.69697	0.757576	0.848485	0.787879	0.848485	0.757576	0.818182	0.727273	0.878788	0.727273	0.878788	0.848485	0.818182	0.787879	0.69697
94	0.787879	0.727273	0.848485	0.848485	0.818182	0.727273	0.878788	0.787879	0.818182	0.848485	0.818182	0.757576	0.757576	0.848485	0.727273	0.787879	0.878788	0.848485	0.818182	0.787879	0.818182	0.939394	0.939394	0.848485	0.727273	0.69697	0.787879	0.757576	0.848485	0.727273	0.727273	0.848485	0.848485	0.757576	0.787879	0.848485	0.818182	0.757576	0.818182	0.848485	0.787879	0.818182	0.787879	0.757576	0.848485	0.757576	0.848485	0.818182	0.666667
95	0.787879	0.787879	0.787879	0.787879	0.878788	0.787879	0.878788	0.909091	0.757576	0.787879	0.878788	0.818182	0.757576	0.848485	0.727273	0.848485	0.757576	0.909091	0.818182	0.848485	0.818182	0.757576	0.818182	0.727273	0.727273	0.878788	0.727273	0.818182	0.787879	0.727273	0.727273	0.727273	0.787879	0.757576	0.727273	0.787879	0.818182	0.818182	0.757576	0.727273	0.848485	0.878788	0.787879	0.818182	0.848485	0.818182	0.787879	0.878788	0.787879
96	0.787879	0.787879	0.727273	0.727273	0.878788	0.787879	0.818182	0.969697	0.69697	0.787879	0.818182	0.878788	0.818182	0.787879	0.787879	0.848485	0.757576	0.848485	0.818182	0.848485	0.878788	0.757576	0.757576	0.727273	0.727273	0.878788	0.787879	0.818182	0.787879	0.787879	0.727273	0.727273	0.787879	0.757576	0.787879	0.848485	0.757576	0.757576	0.757576	0.727273	0.848485	0.939394	0.787879	0.757576	0.848485	0.818182	0.787879	0.878788	0.848485
97	0.787879	0.787879	0.848485	0.787879	0.818182	0.848485	0.818182	0.727273	0.818182	0.787879	0.878788	0.818182	0.818182	0.787879	0.787879	0.787879	0.818182	0.727273	0.818182	0.727273	0.69697	0.818182	0.818182	0.787879	0.848485	0.757576	0.727273	0.818182	0.727273	0.727273	0.787879	0.848485	0.666667	0.878788	0.787879	0.727273	0.818182	0.818182	0.757576	0.787879	0.727273	0.757576	0.727273	0.818182	0.787879	0.818182	0.787879	0.818182	0.787879
98	0.787879	0.787879	0.787879	0.787879	0.818182	0.848485	0.939394	0.848485	0.818182	0.909091	0.878788	0.818182	0.757576	0.848485	0.727273	0.787879	0.818182	0.909091	0.939394	0.909091	0.878788	0.878788	0.878788	0.848485	0.727273	0.818182	0.787879	0.818182	0.909091	0.787879	0.848485	0.727273	0.909091	0.818182	0.787879	0.909091	0.878788	0.818182	0.818182	0.727273	0.787879	0.818182	0.787879	0.757576	0.848485	0.757576	0.787879	0.939394	0.727273
99	0.787879	0.787879	0.727273	0.727273	0.878788	0.848485	0.818182	0.969697	0.757576	0.787879	0.818182	0.939394	0.878788	0.787879	0.848485	0.848485	0.818182	0.848485	0.818182	0.848485	0.878788	0.757576	0.757576	0.787879	0.787879	0.818182	0.848485	0.818182	0.787879	0.848485	0.787879	0.787879	0.787879	0.818182	0.787879	0.848485	0.757576	0.818182	0.757576	0.727273	0.848485	0.939394	0.727273	0.757576	0.848485	0.818182	0.787879	0.878788	0.909091
100	0.818182	0.757576	0.818182	0.818182	0.787879	0.818182	0.909091	0.757576	0.848485	0.818182	0.848485	0.787879	0.727273	0.818182	0.69697	0.757576	0.848485	0.878788	0.848485	0.818182	0.787879	0.909091	0.909091	0.878788	0.757576	0.727273	0.757576	0.787879	0.818182	0.757576	0.818182	0.818182	0.818182	0.787879	0.757576	0.818182	0.848485	0.848485	0.787879	0.757576	0.757576	0.787879	0.757576	0.787879	0.818182	0.727273	0.818182	0.848485	0.69697
101	0.787879	0.727273	0.848485	0.787879	0.818182	0.909091	0.878788	0.848485	0.878788	0.909091	0.878788	0.878788	0.878788	0.848485	0.848485	0.787879	0.878788	0.787879	0.878788	0.848485	0.818182	0.757576	0.878788	0.787879	0.727273	0.818182	0.848485	0.939394	0.909091	0.787879	0.848485	0.787879	0.848485	0.939394	0.787879	0.848485	0.818182	0.818182	0.818182	0.787879	0.727273	0.818182	0.666667	0.878788	0.787879	0.757576	0.727273	0.939394	0.787879
102	0.787879	0.848485	0.666667	0.727273	0.757576	0.787879	0.757576	0.848485	0.757576	0.727273	0.69697	0.878788	0.818182	0.787879	0.787879	0.787879	0.757576	0.848485	0.757576	0.787879	0.818182	0.818182	0.757576	0.848485	0.787879	0.69697	0.848485	0.757576	0.727273	0.848485	0.787879	0.848485	0.787879	0.757576	0.727273	0.787879	0.69697	0.818182	0.757576	0.666667	0.787879	0.878788	0.727273	0.69697	0.787879	0.69697	0.787879	0.757576	0.848485
103	0.818182	0.757576	0.757576	0.757576	0.787879	0.818182	0.848485	0.757576	0.909091	0.818182	0.787879	0.727273	0.727273	0.818182	0.757576	0.757576	0.848485	0.878788	0.787879	0.878788	0.787879	0.787879	0.848485	0.878788	0.818182	0.787879	0.878788	0.787879	0.878788	0.818182	0.818182	0.818182	0.878788	0.787879	0.636364	0.818182	0.848485	0.909091	0.848485	0.757576	0.818182	0.727273	0.757576	0.848485	0.818182	0.787879	0.818182	0.787879	0.757576
104	0.787879	0.787879	0.787879	0.787879	0.818182	0.787879	0.757576	0.848485	0.818182	0.727273	0.757576	0.878788	0.878788	0.848485	0.848485	0.848485	0.818182	0.787879	0.69697	0.727273	0.757576	0.757576	0.818182	0.787879	0.787879	0.69697	0.848485	0.818182	0.727273	0.787879	0.727273	0.909091	0.727273	0.818182	0.727273	0.727273	0.69697	0.818182	0.757576	0.787879	0.787879	0.878788	0.666667	0.818182	0.787879	0.757576	0.787879	0.757576	0.848485
105	0.818182	0.69697	0.818182	0.818182	0.727273	0.818182	0.848485	0.69697	0.848485	0.757576	0.787879	0.787879	0.787879	0.878788	0.757576	0.757576	0.848485	0.757576	0.727273	0.757576	0.666667	0.787879	0.848485	0.818182	0.818182	0.666667	0.818182	0.848485	0.757576	0.757576	0.757576	0.878788	0.757576	0.848485	0.69697	0.757576	0.787879	0.848485	0.787879	0.818182	0.69697	0.727273	0.69697	0.848485	0.818182	0.727273	0.757576	0.787879	0.69697
106	0.818182	0.818182	0.818182	0.757576	0.787879	0.939394	0.787879	0.757576	0.909091	0.878788	0.848485	0.848485	0.909091	0.818182	0.939394	0.818182	0.848485	0.69697	0.848485	0.818182	0.727273	0.727273	0.787879	0.818182	0.818182	0.848485	0.878788	0.909091	0.878788	0.818182	0.878788	0.757576	0.757576	0.969697	0.757576	0.818182	0.848485	0.848485	0.848485	0.757576	0.69697	0.727273	0.636364	0.909091	0.69697	0.787879	0.757576	0.848485	0.878788
107	0.787879	0.787879	0.727273	0.727273	0.818182	0.787879	0.878788	0.848485	0.757576	0.848485	0.818182	0.757576	0.69697	0.787879	0.666667	0.727273	0.757576	0.909091	0.878788	0.909091	0.878788	0.818182	0.818182	0.787879	0.727273	0.878788	0.787879	0.818182	0.848485	0.787879	0.787879	0.727273	0.909091	0.757576	0.727273	0.848485	0.818182	0.818182	0.818182	0.666667	0.787879	0.818182	0.848485	0.757576	0.848485	0.757576	0.787879	0.878788	0.727273
108	0.757576	0.818182	0.878788	0.818182	0.909091	0.818182	0.909091	0.818182	0.848485	0.939394	0.969697	0.787879	0.787879	0.818182	0.757576	0.818182	0.848485	0.878788	0.969697	0.818182	0.848485	0.909091	0.909091	0.818182	0.757576	0.848485	0.69697	0.787879	0.878788	0.69697	0.818182	0.757576	0.818182	0.848485	0.818182	0.818182	0.909091	0.787879	0.787879	0.757576	0.818182	0.787879	0.818182	0.787879	0.818182	0.848485	0.818182	0.909091	0.757576
109	0.787879	0.787879	0.848485	0.848485	0.818182	0.848485	0.878788	0.787879	0.818182	0.909091	0.878788	0.757576	0.818182	0.848485	0.848485	0.787879	0.878788	0.787879	0.878788	0.909091	0.757576	0.818182	0.818182	0.787879	0.787879	0.878788	0.848485	0.818182	0.909091	0.787879	0.787879	0.666667	0.848485	0.878788	0.787879	0.909091	0.939394	0.818182	0.939394	0.787879	0.727273	0.757576	0.727273	0.818182	0.787879	0.818182	0.848485	0.878788	0.787879
110	0.757576	0.757576	0.818182	0.818182	0.909091	0.69697	0.787879	0.878788	0.727273	0.818182	0.848485	0.787879	0.848485	0.818182	0.818182	0.818182	0.848485	0.818182	0.787879	0.757576	0.787879	0.787879	0.787879	0.69697	0.757576	0.848485	0.757576	0.787879	0.757576	0.69697	0.636364	0.757576	0.757576	0.787879	0.757576	0.757576	0.787879	0.727273	0.787879	0.757576	0.818182	0.848485	0.818182	0.787879	0.818182	0.848485	0.818182	0.787879	0.818182
111	0.787879	0.848485	0.727273	0.787879	0.818182	0.787879	0.818182	0.787879	0.818182	0.787879	0.818182	0.818182	0.818182	0.848485	0.787879	0.787879	0.818182	0.909091	0.818182	0.787879	0.757576	0.818182	0.757576	0.848485	0.848485	0.757576	0.787879	0.757576	0.727273	0.787879	0.787879	0.787879	0.787879	0.818182	0.666667	0.727273	0.818182	0.878788	0.757576	0.606061	0.787879	0.757576	0.787879	0.757576	0.787879	0.757576	0.787879	0.757576	0.848485
112	0.666667	0.848485	0.787879	0.787879	0.818182	0.727273	0.757576	0.909091	0.757576	0.848485	0.757576	0.818182	0.818182	0.787879	0.787879	0.787879	0.757576	0.848485	0.818182	0.787879	0.878788	0.818182	0.878788	0.727273	0.666667	0.757576	0.787879	0.757576	0.848485	0.727273	0.727273	0.848485	0.848485	0.757576	0.787879	0.787879	0.69697	0.69697	0.818182	0.787879	0.848485	0.939394	0.727273	0.69697	0.787879	0.757576	0.787879	0.818182	0.787879
114	0.757576	0.757576	0.878788	0.818182	0.909091	0.818182	0.909091	0.878788	0.848485	0.878788	0.909091	0.787879	0.787879	0.878788	0.757576	0.818182	0.848485	0.878788	0.848485	0.878788	0.848485	0.787879	0.909091	0.757576	0.757576	0.848485	0.818182	0.848485	0.878788	0.757576	0.757576	0.818182	0.878788	0.848485	0.757576	0.818182	0.848485	0.848485	0.848485	0.818182	0.818182	0.848485	0.757576	0.848485	0.878788	0.848485	0.818182	0.909091	0.757576
115	0.787879	0.848485	0.848485	0.787879	0.878788	0.848485	0.818182	0.787879	0.818182	0.787879	0.878788	0.818182	0.818182	0.787879	0.787879	0.787879	0.818182	0.787879	0.818182	0.787879	0.757576	0.818182	0.818182	0.787879	0.848485	0.818182	0.787879	0.818182	0.727273	0.787879	0.787879	0.848485	0.727273	0.878788	0.787879	0.727273	0.818182	0.878788	0.818182	0.727273	0.727273	0.818182	0.727273	0.818182	0.787879	0.818182	0.848485	0.818182	0.848485
116	0.848485	0.727273	0.727273	0.727273	0.757576	0.848485	0.757576	0.787879	0.878788	0.727273	0.757576	0.878788	0.878788	0.848485	0.909091	0.909091	0.818182	0.727273	0.69697	0.727273	0.69697	0.69697	0.757576	0.848485	0.848485	0.69697	0.848485	0.818182	0.787879	0.787879	0.787879	0.848485	0.666667	0.818182	0.666667	0.787879	0.757576	0.818182	0.69697	0.848485	0.848485	0.757576	0.666667	0.878788	0.787879	0.818182	0.727273	0.757576	0.848485
117	0.787879	0.848485	0.787879	0.727273	0.878788	0.848485	0.757576	0.848485	0.757576	0.787879	0.818182	0.878788	0.878788	0.727273	0.848485	0.787879	0.818182	0.727273	0.818182	0.787879	0.818182	0.818182	0.757576	0.787879	0.848485	0.818182	0.848485	0.818182	0.727273	0.848485	0.787879	0.848485	0.727273	0.878788	0.848485	0.787879	0.757576	0.818182	0.818182	0.727273	0.727273	0.878788	0.727273	0.757576	0.787879	0.818182	0.848485	0.818182	0.909091
118	0.878788	0.757576	0.69697	0.69697	0.848485	0.818182	0.787879	0.757576	0.787879	0.69697	0.787879	0.787879	0.787879	0.757576	0.818182	0.818182	0.848485	0.757576	0.727273	0.818182	0.727273	0.787879	0.666667	0.878788	1	0.787879	0.878788	0.727273	0.69697	0.878788	0.757576	0.818182	0.69697	0.787879	0.69697	0.818182	0.848485	0.909091	0.787879	0.757576	0.818182	0.727273	0.818182	0.787879	0.878788	0.909091	0.878788	0.727273	0.878788
119	0.848485	0.787879	0.787879	0.787879	0.878788	0.787879	0.818182	0.787879	0.757576	0.727273	0.818182	0.818182	0.818182	0.787879	0.787879	0.787879	0.878788	0.787879	0.757576	0.787879	0.757576	0.878788	0.757576	0.848485	0.909091	0.757576	0.848485	0.757576	0.666667	0.848485	0.727273	0.848485	0.727273	0.818182	0.787879	0.787879	0.818182	0.878788	0.818182	0.727273	0.727273	0.818182	0.787879	0.757576	0.848485	0.818182	0.909091	0.757576	0.848485
120	0.69697	0.818182	0.818182	0.757576	0.848485	0.818182	0.787879	0.818182	0.787879	0.878788	0.848485	0.727273	0.787879	0.757576	0.818182	0.757576	0.787879	0.757576	0.848485	0.878788	0.787879	0.727273	0.787879	0.69697	0.818182	0.909091	0.818182	0.787879	0.878788	0.757576	0.757576	0.757576	0.818182	0.848485	0.757576	0.818182	0.848485	0.787879	0.909091	0.818182	0.818182	0.787879	0.757576	0.787879	0.818182	0.909091	0.818182	0.848485	0.818182
121	0.787879	0.787879	0.727273	0.787879	0.757576	0.787879	0.757576	0.848485	0.757576	0.727273	0.69697	0.878788	0.878788	0.848485	0.848485	0.787879	0.818182	0.787879	0.69697	0.787879	0.757576	0.757576	0.757576	0.787879	0.787879	0.69697	0.909091	0.818182	0.727273	0.848485	0.727273	0.848485	0.787879	0.818182	0.727273	0.787879	0.69697	0.818182	0.818182	0.727273	0.727273	0.878788	0.666667	0.757576	0.787879	0.69697	0.787879	0.757576	0.848485
122	0.787879	0.787879	0.727273	0.787879	0.757576	0.727273	0.757576	0.727273	0.757576	0.727273	0.757576	0.818182	0.818182	0.787879	0.787879	0.787879	0.818182	0.787879	0.757576	0.666667	0.69697	0.878788	0.757576	0.848485	0.848485	0.636364	0.727273	0.69697	0.666667	0.727273	0.727273	0.848485	0.666667	0.757576	0.727273	0.727273	0.757576	0.757576	0.69697	0.727273	0.787879	0.757576	0.787879	0.69697	0.787879	0.757576	0.787879	0.69697	0.787879
123	0.757576	0.878788	0.818182	0.757576	0.848485	0.878788	0.787879	0.818182	0.787879	0.818182	0.848485	0.848485	0.848485	0.757576	0.818182	0.757576	0.787879	0.757576	0.848485	0.818182	0.787879	0.787879	0.787879	0.757576	0.818182	0.848485	0.818182	0.848485	0.757576	0.818182	0.818182	0.818182	0.757576	0.909091	0.818182	0.757576	0.787879	0.848485	0.848485	0.69697	0.69697	0.848485	0.69697	0.787879	0.757576	0.787879	0.818182	0.848485	0.878788
124	0.818182	0.757576	0.818182	0.757576	0.909091	0.878788	0.848485	0.878788	0.787879	0.878788	0.909091	0.909091	0.909091	0.757576	0.878788	0.818182	0.909091	0.757576	0.909091	0.818182	0.848485	0.848485	0.787879	0.818182	0.818182	0.848485	0.818182	0.848485	0.818182	0.818182	0.818182	0.757576	0.757576	0.909091	0.878788	0.878788	0.848485	0.787879	0.787879	0.757576	0.757576	0.848485	0.757576	0.787879	0.818182	0.848485	0.818182	0.909091	0.878788
125	0.848485	0.848485	0.666667	0.666667	0.818182	0.909091	0.757576	0.909091	0.818182	0.727273	0.757576	0.939394	0.878788	0.787879	0.909091	0.909091	0.757576	0.787879	0.757576	0.848485	0.818182	0.69697	0.69697	0.848485	0.848485	0.818182	0.909091	0.818182	0.787879	0.909091	0.848485	0.787879	0.727273	0.818182	0.727273	0.848485	0.757576	0.878788	0.757576	0.727273	0.848485	0.878788	0.666667	0.818182	0.787879	0.818182	0.787879	0.818182	0.969697
126	0.757576	0.818182	0.757576	0.69697	0.909091	0.818182	0.787879	0.878788	0.787879	0.878788	0.848485	0.848485	0.848485	0.69697	0.818182	0.757576	0.848485	0.818182	0.909091	0.818182	0.909091	0.848485	0.787879	0.818182	0.818182	0.848485	0.818182	0.787879	0.818182	0.818182	0.818182	0.818182	0.818182	0.848485	0.818182	0.818182	0.787879	0.787879	0.787879	0.69697	0.818182	0.848485	0.818182	0.727273	0.818182	0.848485	0.818182	0.848485	0.878788
127	0.818182	0.757576	0.69697	0.757576	0.787879	0.757576	0.787879	0.878788	0.727273	0.757576	0.727273	0.787879	0.787879	0.818182	0.818182	0.818182	0.787879	0.818182	0.727273	0.878788	0.787879	0.727273	0.727273	0.757576	0.757576	0.848485	0.878788	0.787879	0.818182	0.818182	0.69697	0.69697	0.818182	0.727273	0.69697	0.878788	0.787879	0.787879	0.848485	0.757576	0.818182	0.848485	0.757576	0.787879	0.818182	0.787879	0.818182	0.787879	0.818182
129	0.848485	0.727273	0.727273	0.727273	0.818182	0.848485	0.818182	0.848485	0.818182	0.727273	0.818182	0.939394	0.878788	0.848485	0.848485	0.909091	0.818182	0.787879	0.757576	0.727273	0.757576	0.757576	0.757576	0.848485	0.848485	0.69697	0.787879	0.818182	0.727273	0.787879	0.787879	0.848485	0.666667	0.818182	0.727273	0.787879	0.757576	0.818182	0.636364	0.787879	0.848485	0.818182	0.727273	0.818182	0.848485	0.818182	0.727273	0.818182	0.848485
130	0.787879	0.787879	0.787879	0.787879	0.818182	0.848485	0.757576	0.848485	0.818182	0.848485	0.818182	0.939394	1	0.848485	0.969697	0.848485	0.878788	0.727273	0.818182	0.727273	0.757576	0.757576	0.757576	0.787879	0.787879	0.757576	0.848485	0.878788	0.787879	0.787879	0.787879	0.787879	0.727273	0.939394	0.787879	0.787879	0.757576	0.757576	0.757576	0.727273	0.727273	0.818182	0.666667	0.818182	0.727273	0.757576	0.727273	0.818182	0.909091
131	0.727273	0.727273	0.787879	0.787879	0.878788	0.727273	0.818182	0.909091	0.757576	0.787879	0.818182	0.818182	0.818182	0.848485	0.787879	0.848485	0.818182	0.848485	0.757576	0.787879	0.818182	0.757576	0.818182	0.727273	0.787879	0.757576	0.787879	0.757576	0.787879	0.727273	0.666667	0.848485	0.787879	0.757576	0.727273	0.787879	0.757576	0.757576	0.757576	0.848485	0.909091	0.878788	0.787879	0.757576	0.909091	0.878788	0.787879	0.818182	0.787879
132	0.848485	0.787879	0.787879	0.787879	0.757576	0.848485	0.818182	0.666667	0.818182	0.727273	0.818182	0.757576	0.757576	0.787879	0.787879	0.787879	0.818182	0.727273	0.757576	0.787879	0.636364	0.818182	0.757576	0.848485	0.909091	0.757576	0.787879	0.757576	0.727273	0.787879	0.787879	0.787879	0.666667	0.818182	0.727273	0.787879	0.878788	0.878788	0.818182	0.787879	0.727273	0.69697	0.727273	0.818182	0.787879	0.818182	0.848485	0.757576	0.787879
133	0.69697	0.818182	0.818182	0.818182	0.848485	0.69697	0.727273	0.818182	0.787879	0.818182	0.787879	0.787879	0.848485	0.757576	0.818182	0.757576	0.848485	0.818182	0.787879	0.69697	0.787879	0.848485	0.848485	0.757576	0.757576	0.727273	0.757576	0.727273	0.757576	0.69697	0.69697	0.878788	0.757576	0.787879	0.757576	0.69697	0.727273	0.727273	0.787879	0.757576	0.818182	0.848485	0.757576	0.727273	0.757576	0.787879	0.818182	0.727273	0.818182
134	0.757576	0.818182	0.757576	0.69697	0.787879	0.818182	0.727273	0.818182	0.848485	0.818182	0.727273	0.848485	0.848485	0.757576	0.818182	0.757576	0.787879	0.757576	0.787879	0.757576	0.848485	0.787879	0.848485	0.818182	0.757576	0.727273	0.878788	0.848485	0.818182	0.818182	0.818182	0.939394	0.818182	0.848485	0.757576	0.757576	0.666667	0.787879	0.787879	0.757576	0.757576	0.848485	0.69697	0.787879	0.757576	0.727273	0.757576	0.787879	0.818182
135	0.757576	0.757576	0.69697	0.636364	0.727273	0.757576	0.666667	0.757576	0.787879	0.757576	0.666667	0.787879	0.787879	0.69697	0.757576	0.69697	0.727273	0.69697	0.727273	0.69697	0.787879	0.727273	0.787879	0.757576	0.69697	0.727273	0.818182	0.848485	0.757576	0.818182	0.757576	0.878788	0.757576	0.787879	0.69697	0.69697	0.606061	0.727273	0.727273	0.69697	0.69697	0.787879	0.69697	0.787879	0.69697	0.666667	0.69697	0.727273	0.757576
136	0.757576	0.818182	0.757576	0.757576	0.727273	0.818182	0.787879	0.757576	0.848485	0.818182	0.727273	0.787879	0.787879	0.818182	0.757576	0.69697	0.787879	0.818182	0.787879	0.818182	0.787879	0.787879	0.848485	0.818182	0.757576	0.727273	0.878788	0.848485	0.818182	0.818182	0.818182	0.878788	0.878788	0.848485	0.69697	0.757576	0.727273	0.848485	0.848485	0.69697	0.69697	0.787879	0.69697	0.787879	0.757576	0.666667	0.757576	0.787879	0.757576
137	0.818182	0.878788	0.757576	0.69697	0.848485	0.878788	0.787879	0.757576	0.909091	0.818182	0.848485	0.787879	0.787879	0.757576	0.818182	0.818182	0.787879	0.818182	0.848485	0.818182	0.787879	0.787879	0.787879	0.878788	0.878788	0.848485	0.818182	0.787879	0.818182	0.818182	0.878788	0.818182	0.757576	0.848485	0.69697	0.757576	0.848485	0.909091	0.787879	0.69697	0.818182	0.727273	0.757576	0.848485	0.757576	0.848485	0.818182	0.787879	0.878788
138	0.848485	0.848485	0.727273	0.727273	0.878788	0.848485	0.757576	0.848485	0.818182	0.727273	0.818182	0.878788	0.878788	0.787879	0.909091	0.909091	0.818182	0.787879	0.757576	0.787879	0.757576	0.757576	0.69697	0.848485	0.909091	0.818182	0.848485	0.757576	0.727273	0.848485	0.787879	0.787879	0.666667	0.818182	0.727273	0.787879	0.818182	0.878788	0.757576	0.727273	0.848485	0.818182	0.727273	0.818182	0.787879	0.878788	0.848485	0.757576	0.969697
140	0.818182	0.818182	0.757576	0.69697	0.848485	0.818182	0.787879	0.878788	0.727273	0.757576	0.787879	0.787879	0.727273	0.69697	0.757576	0.818182	0.727273	0.757576	0.787879	0.878788	0.848485	0.787879	0.787879	0.757576	0.757576	0.909091	0.818182	0.787879	0.818182	0.818182	0.757576	0.757576	0.757576	0.727273	0.818182	0.878788	0.787879	0.787879	0.848485	0.818182	0.818182	0.909091	0.757576	0.787879	0.818182	0.848485	0.878788	0.848485	0.818182
141	0.727273	0.787879	0.848485	0.787879	0.818182	0.787879	0.818182	0.727273	0.878788	0.909091	0.878788	0.69697	0.757576	0.787879	0.787879	0.787879	0.818182	0.787879	0.878788	0.787879	0.757576	0.818182	0.878788	0.787879	0.787879	0.818182	0.727273	0.757576	0.909091	0.666667	0.787879	0.787879	0.787879	0.818182	0.727273	0.787879	0.878788	0.757576	0.818182	0.848485	0.848485	0.69697	0.787879	0.818182	0.787879	0.878788	0.787879	0.818182	0.727273
142	0.878788	0.757576	0.757576	0.757576	0.848485	0.878788	0.848485	0.878788	0.848485	0.757576	0.848485	0.969697	0.909091	0.878788	0.878788	0.939394	0.848485	0.818182	0.787879	0.757576	0.787879	0.787879	0.787879	0.878788	0.818182	0.727273	0.818182	0.848485	0.757576	0.818182	0.818182	0.818182	0.69697	0.848485	0.757576	0.818182	0.787879	0.848485	0.666667	0.757576	0.818182	0.848485	0.69697	0.848485	0.818182	0.787879	0.757576	0.848485	0.878788
143	0.848485	0.666667	0.787879	0.848485	0.818182	0.787879	0.878788	0.848485	0.818182	0.787879	0.818182	0.878788	0.878788	0.909091	0.848485	0.848485	0.939394	0.848485	0.757576	0.787879	0.757576	0.818182	0.818182	0.848485	0.787879	0.69697	0.848485	0.818182	0.787879	0.787879	0.727273	0.787879	0.787879	0.818182	0.727273	0.848485	0.818182	0.818182	0.757576	0.787879	0.787879	0.818182	0.727273	0.818182	0.848485	0.757576	0.787879	0.818182	0.787879
[truncated: 90 more columns]
